# Supplementary material
Source: Research Square preprint supplement (doi:10.21203/rs.3.rs-8725406/v1)
Supplement: Supplementary file 1 [file b9f5bb8219ec66658d2e91d1.docx]

***Supplementary Information***

**Redox Implications of Oxygen Binding in Hemoglobin and Myoglobin: Thermodynamics of the (Fe3+/Fe2+) Oxidation-Reduction of Heme-bound fluoride Complexes versus Fluoride Binding**

Kayla Flandersa, Annie Mathewb, Mary Lockwood, Ashley Frankenfieldc, David Deysherb, Kimberly Wodzanowskid, Tanaka Madae, Thomas Nagle, and Jose Cerdaf*

a*Benjamin N. Cardozo School of Law, New York City, NY*

b*Philadelphia College of Osteopathic Medicine, Philadelphia, PA*

c*Department of Chemistry, The George Washington University, Washington, D.C.*

d*Department of Biology, University of Pennsylvania, Philadelphia, PA*

e*University of Washington School of Medicine, Seattle, WA*

f*Department of Chemistry and Biochemistry, Saint Joseph's University, 5600 City Ave. Philadelphia, PA* 19131

**Corresponding author*

Kayla Flanders – kflander@law.cardozo.yu.edu

Annie Mathew- am3268@pcom.edu

Mary Lockwood – lockwoodmary1@gmail.com

Ashley Frankenfield – afrankenfield@gwmail.gwu.edu

David Deysher –  dd9067@pcom.edu

Kimberly Wodzanowski – kwodz@sas.upenn.edu

Tanaka Mada - tmada@uw.edu

Thomas Nagle – thomassnagle@gmail.com

Jose Cerda – jcerda@sju.edu

Declarations of interest: none.

1. ***Fluoride binding Kd values***

The dissociation constant (*K*d) values for the fluoride binding equilibrium between the heme protein and the heme-bound fluoride complexes of adult horse heart myoglobin (Hh-Mb) and adult hemoglobin (A-Hb) are reported below. The dissociation constant measurement procedure is explained in Section 2.2 of the Materials and Methods and elsewhere.1-3 The standard state for the *K*d measurements is 1.0 M NaF. The data was used to produce the van’t Hoff plots for Hh-Mb and A-Hb, shown in Fig. 5 in the Results section. Data handling for data fits and figures was performed by using Origin 2018b (OriginLab Corporation, Northampton, MA, USA).

***Table 1. Fluoride binding Kd values for horse heart myoglobin***

**pH 5**

***T* (oC) Avg *K*d**

10 0.00161

15 0.00239

20 0.0025

25 0.00304

30 0.00325

35 0.00368

40 0.00387

45 0.0048

50 0.00473

55 0.00552

60 0.00568

65 0.00692

**pH 6**

***T* (oC) Avg *K*d**

10 0.01283

15 0.01399

20 0.01446

25 0.02032

30 0.01926

35 0.01904

40 0.02386

45 0.02426

50 0.02608

**pH 7**

***T*** (oC) **Avg Kd**

10 0.02748

15 0.02599

20 0.02182

25 0.02244

30 0.02198

35 0.02603

45 0.02403

50 0.02288

55 0.02395

60 0.01919

65 0.02195

**pH 8**

***T* (oC) Avg *K*d**

15 0.11925

20 0.07314

25 0.05796

30 0.0616

35 0.03838

40 0.04607

45 0.0323

50 0.03317

55 0.0256

1. 0.0177

***Table 2. Fluoride binding Kd values* for *adult hemoglobin***

**pH 5**

***T* (oC) Avg *K*d**

10 0.00629

15 0.00648

20 0.00878

25 0.00672

30 0.00684

35 0.011

40 0.01086

45 0.01041

50 0.01148

55 0.00846

60 0.01325

**pH 6**

***T* (oC) Avg *K*d**

10 0.01842

15 0.01863

20 0.01846

25 0.02076

30 0.01969

35 0.01922

40 0.0186

45 0.02233

50 0.02195

55 0.02349

60 0.02123

**pH 7**

***T* (oC) Avg *K*d**

10 0.00353

15 0.00347

20 0.00341

25 0.00336

30 0.0033

35 0.00325

40 0.00319

45 0.00314

50 0.0031

55 0.00305

60 0.003

**pH 8**

***T* (oC) Avg *K*d**

10 0.50755

15 0.39142

20 0.22542

25 0.08183

30 0.08411

35 0.05637

40 0.06007

45 0.05437

50 0.05674

55 0.04124

60 0.02162

***2.0* *Fluoride binding enthalpy-entropy compensation plots***

Enthalpy and entropy values were obtained from the Ln (*K*d) vs 1/T van’t Hoff plots as shown in Fig. 5 in the Results section. The D*H*o’ and DSo’ values in Table 1 of the Results section are reported for the association equilibria between the heme proteins and the fluoride ion. Below are the enthalpy-entropy compensation plots for the fluoride binding association equilibria. The linear relation between D*H*o’ and DSo’ can be used to express the enthalpy as a function of entropy: **D*H*o’ = D*H*0 + *T*c (D*S*o’)**, with D*H*0 representing the enthalpy change when D*S*o’ = 0 and *T*c is the compensation temperature. For the plots, the D*H*0 and *T*cparameters are given by the y-intercept and the slope, respectively.


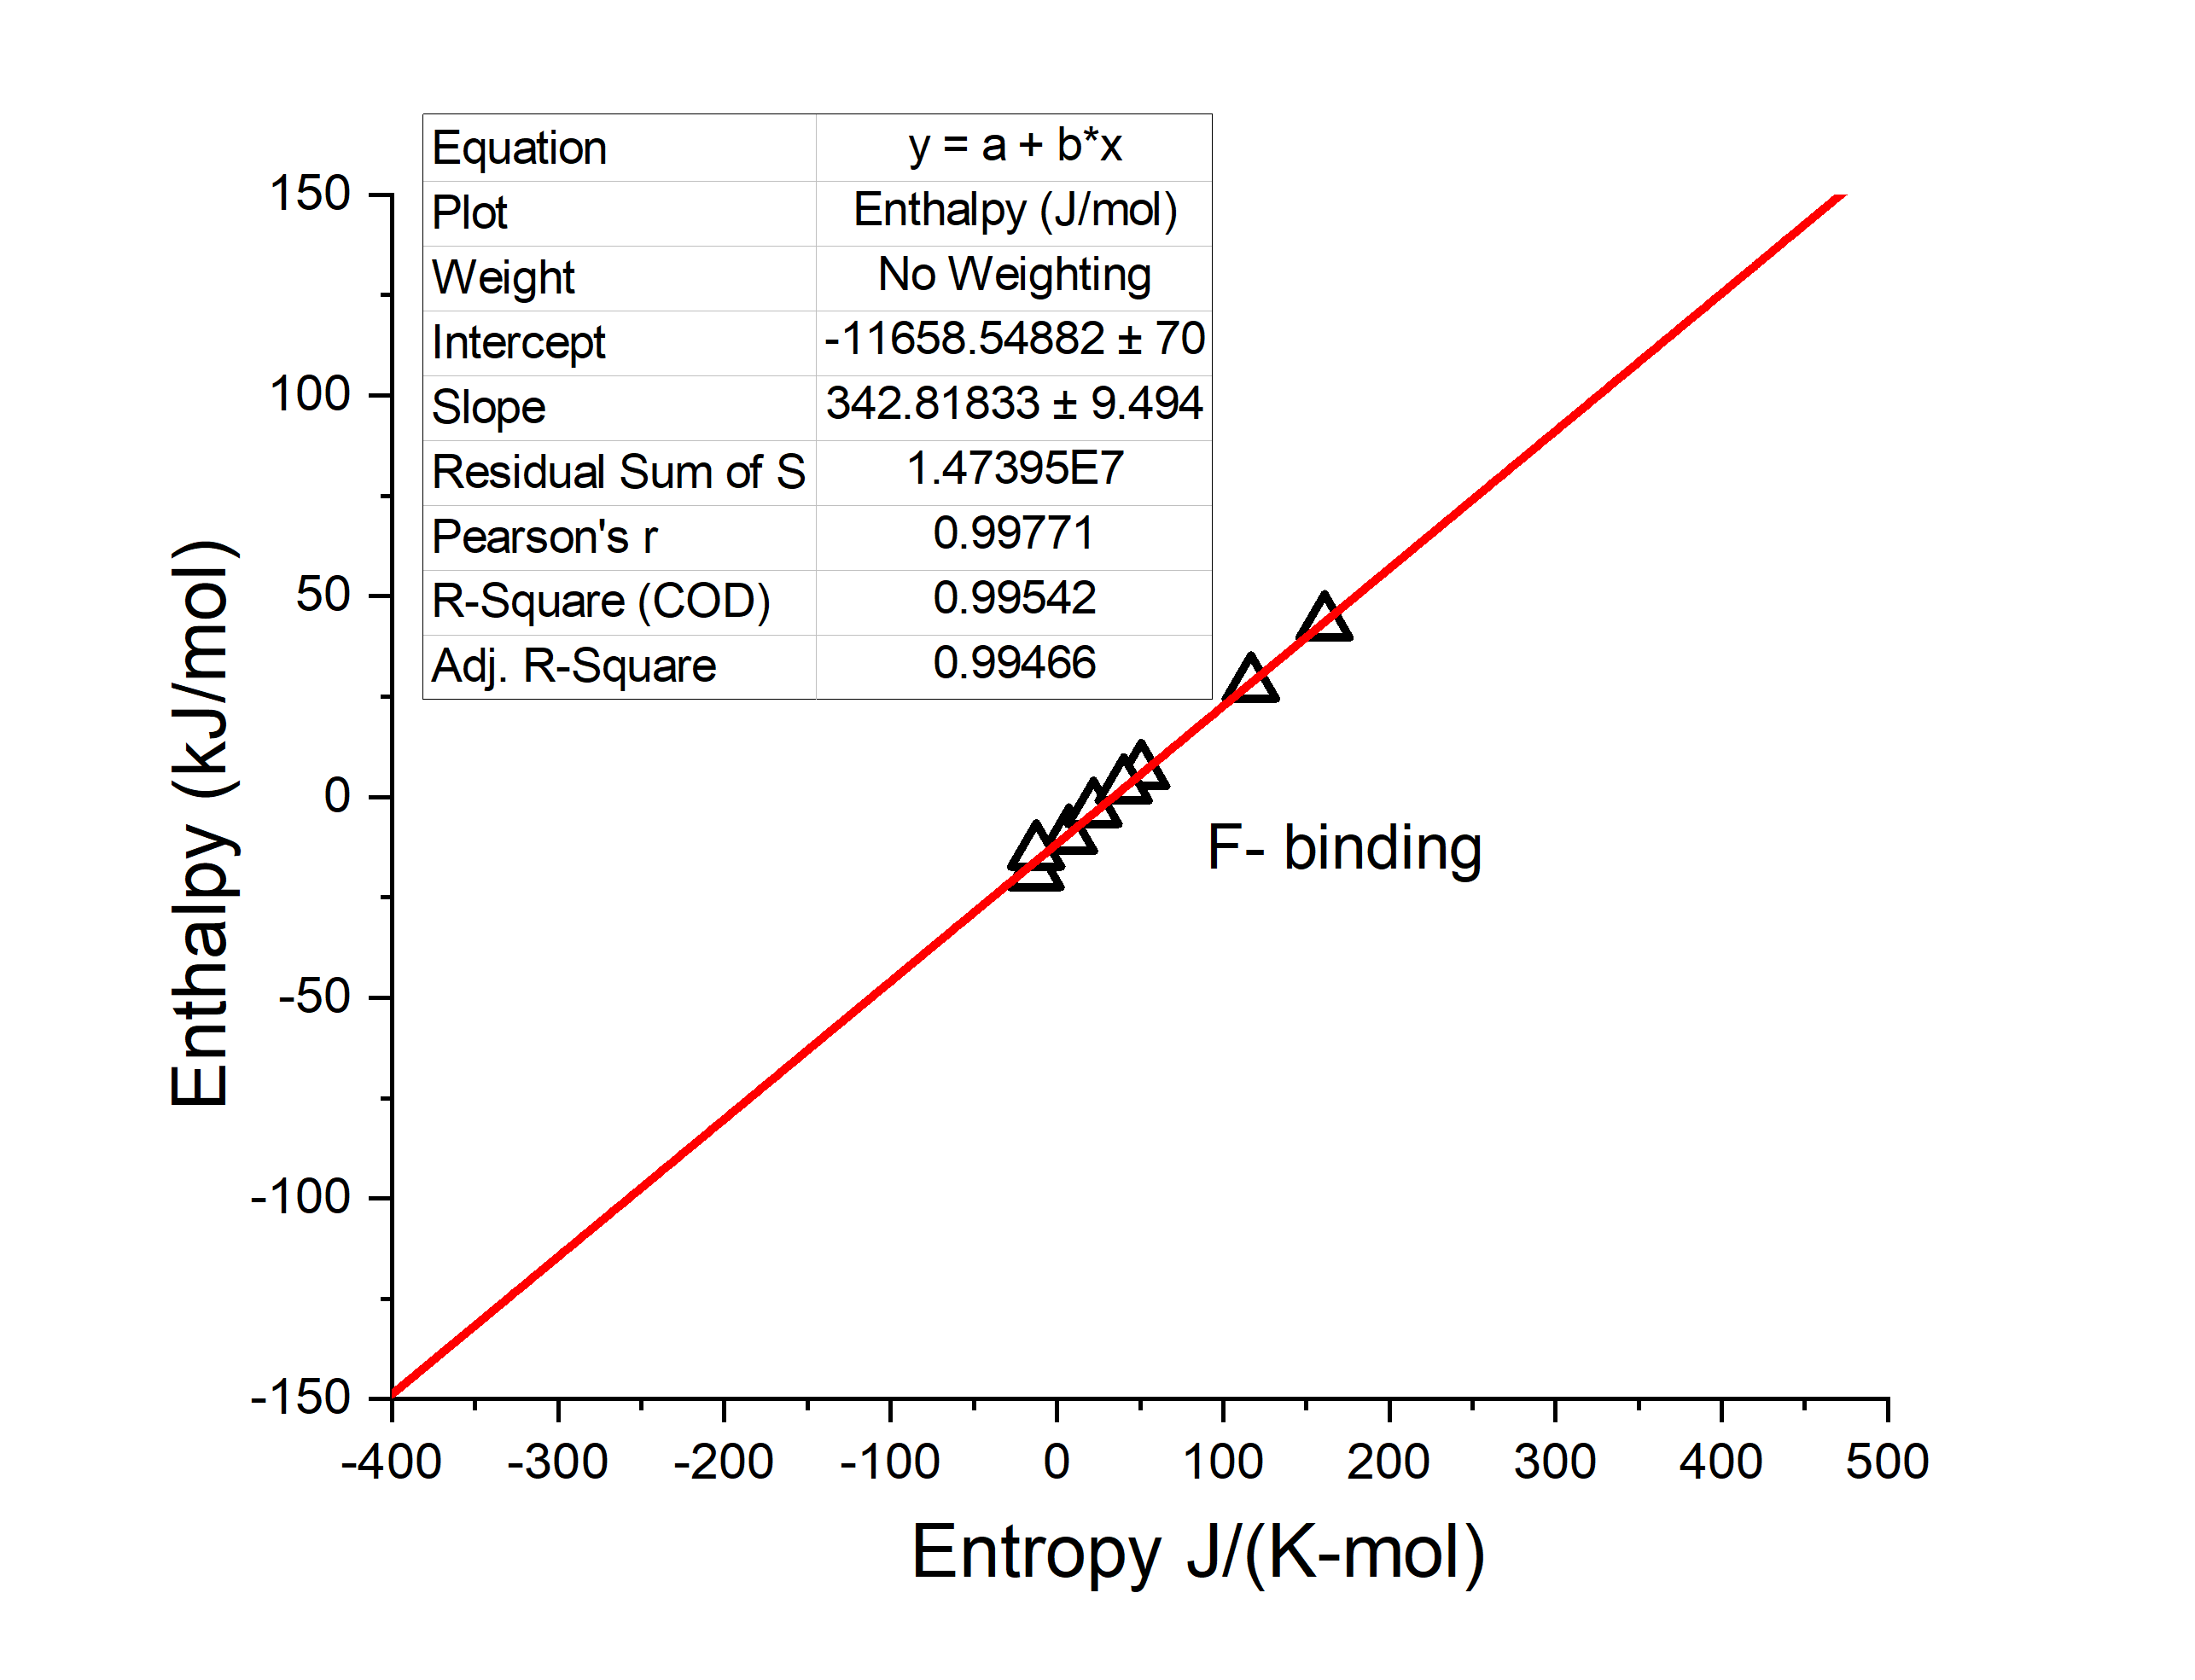


**Fig. 1** The Ln (*K*d) vs 1/T van’t Hoff plot from the D*H*o’ and DSo’ values in Table 1 of the Results section. The D*H*0 is -11.7 kJ mol-1, and the compensation temperature (*T*c) is 343 K.


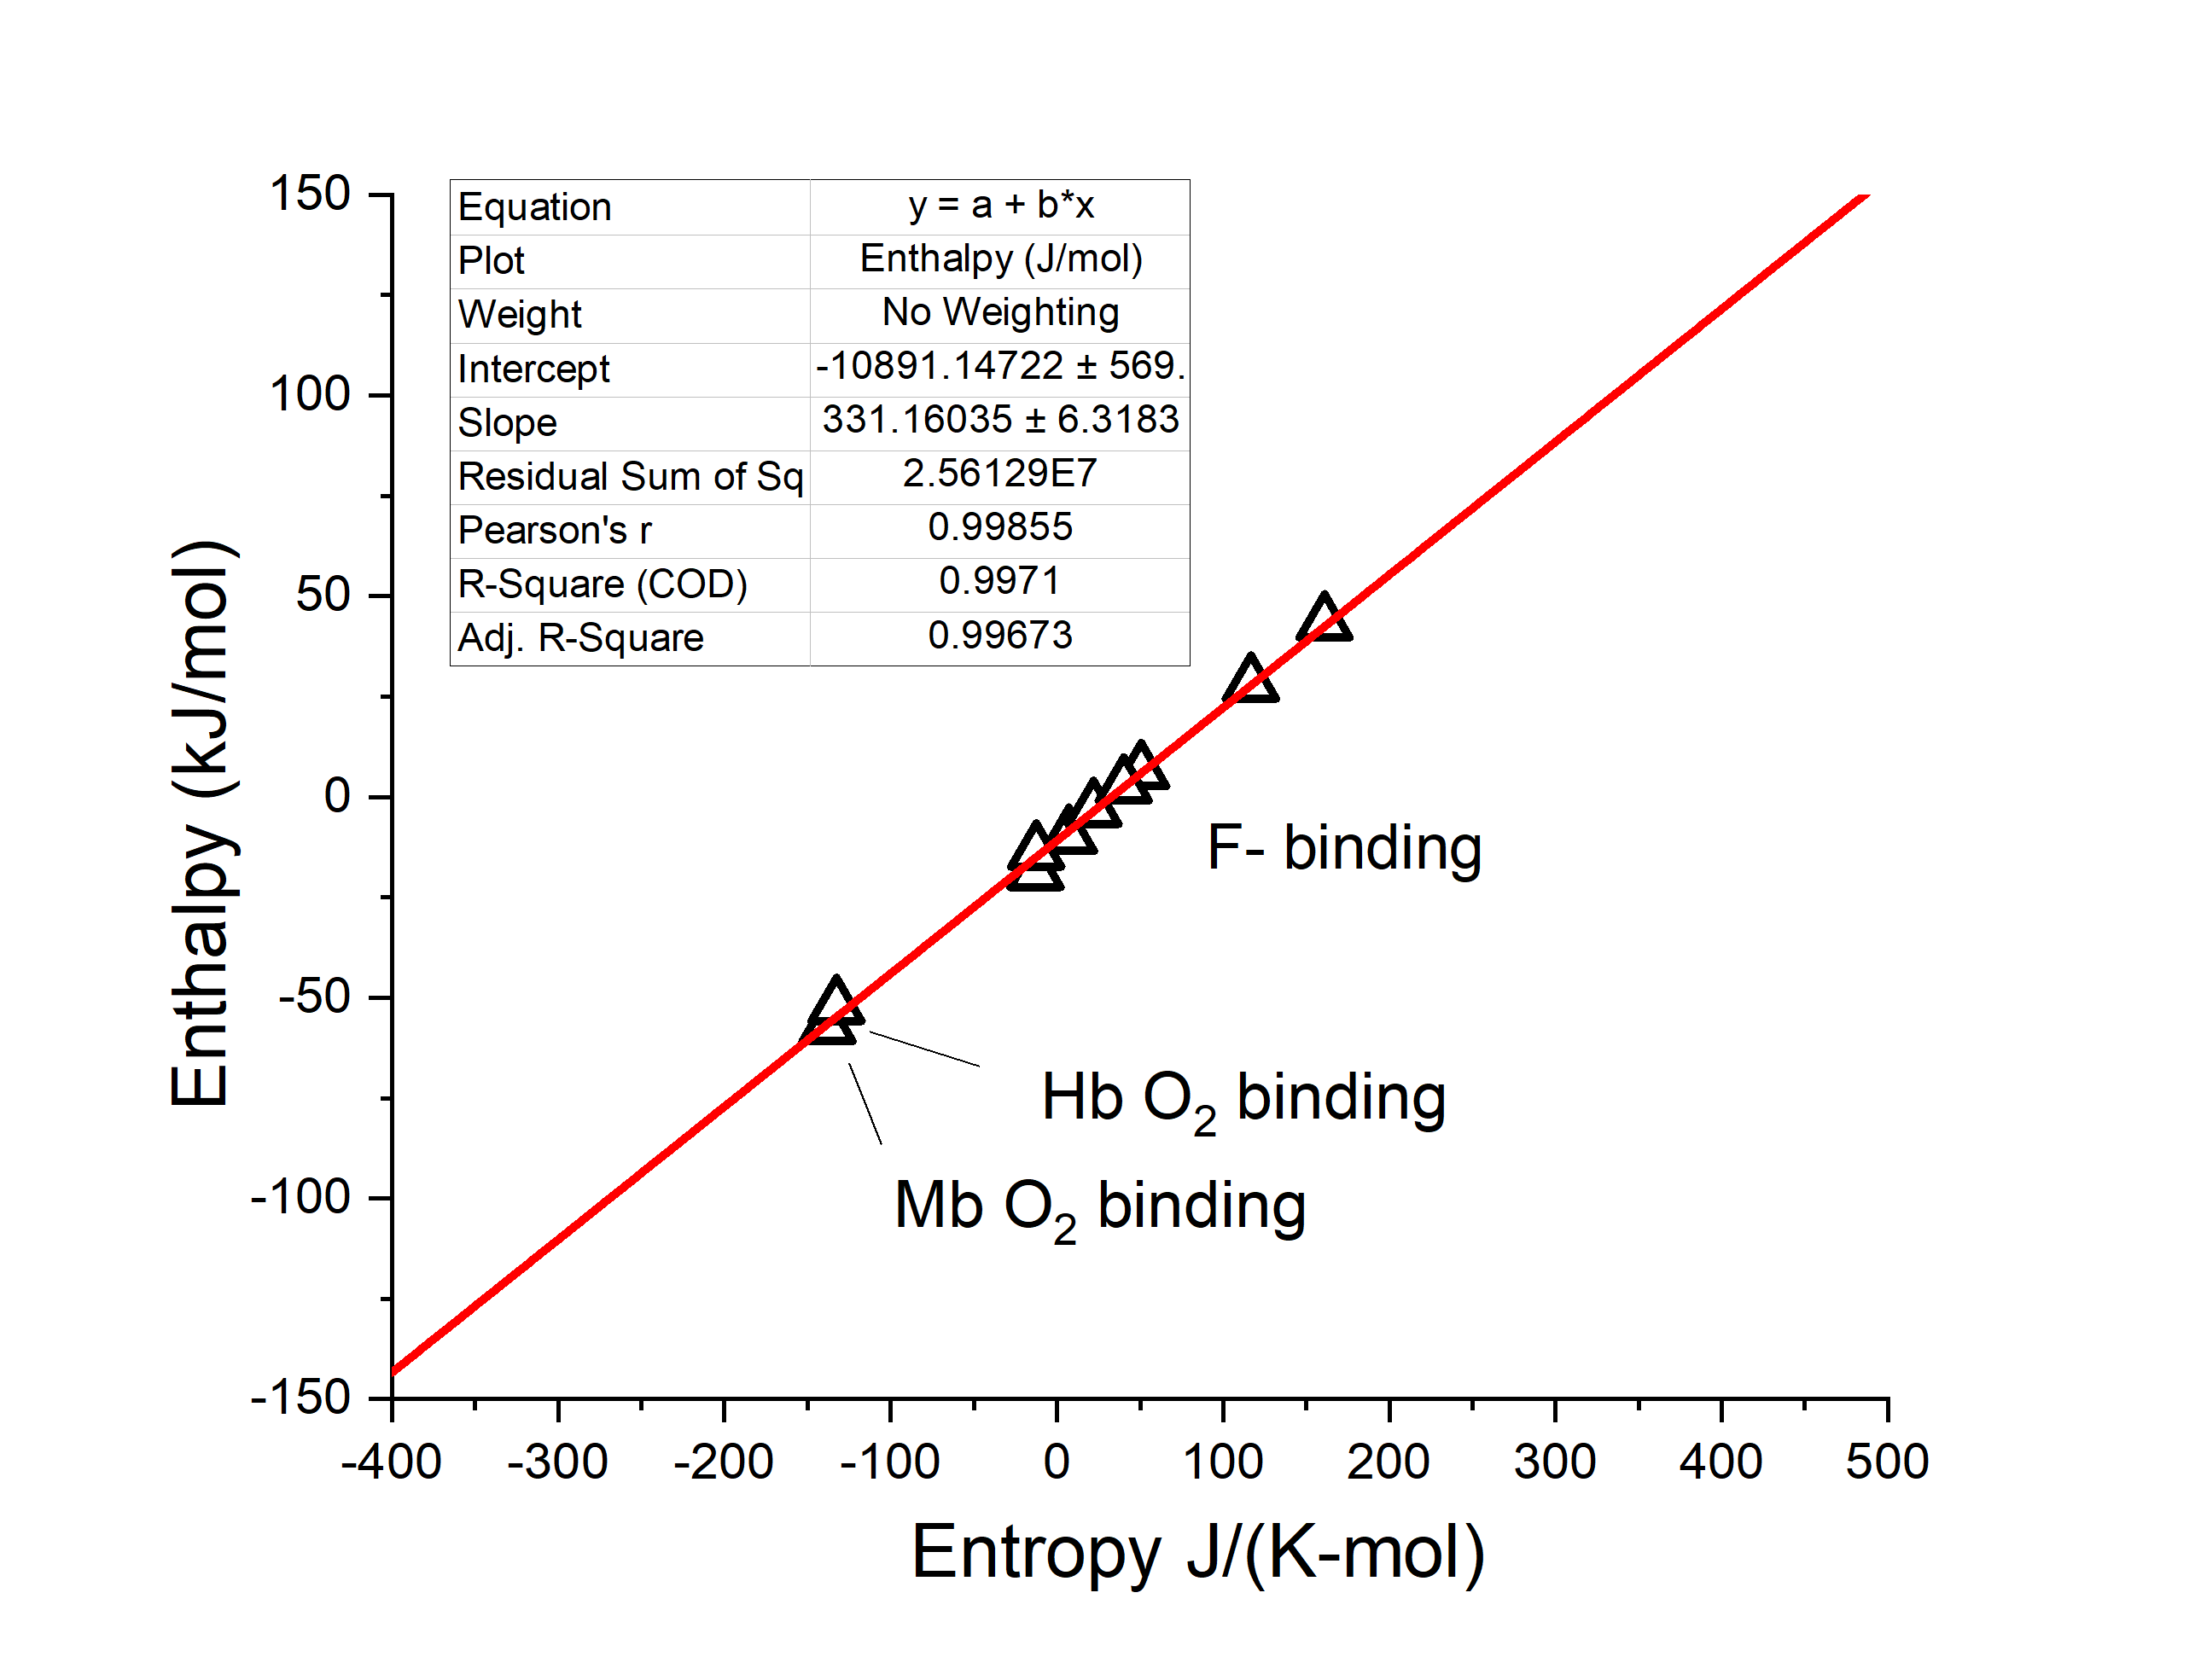


**Fig. 2** The Ln (*K*d) vs 1/T van’t Hoff plot from the D*H*o’ and DSo’ values in Table 1 of the Results section, and including the D*H*o’ and DSo’ values for oxygen binding equilibria measured by other groups. The values for Hh-Mb are -57 kJ mol-1 and -138 J K-1 mol-1,4-6 and -52 kJ mol-1 and -133 J K-1 mol-1 for the average value from the four individual oxygen binding measurements in A-Hb.7,8 . The plot with oxygen binding yields D*H*0 and *T*c values of -10.9 kJ mol-1 and 331 K, respectively.

***2.0 Reduction potential (Em) measurements***

The midpoint reduction potentials (*E*m) values for the one-electron reduction of Hh-Mb and A-Hb of metaquo and their respective heme-fluoride complexes shown below. The measurements were obtained from the UV-vis spectroelectrochemical spectra as shown in Fig. 4 of the Results section. Experimental procedure is explained in Section 2.3 of the Materials and Methods and elsewhere.1,9 The reduction potentials are reported in mV vs Ag-AgCl. For the heme-fluoride complexes at pH 5, the midpoint reduction potentials are reported in two sets, one for the “low temperature” component, and the other set corresponds to the “high temperature” component. Measured *E*m values for A-Hb at 30 oC agree with those reported by Antonini and

Brunori.4,10,11

***Table 3. Reduction potential Em values* *for horse heart myoglobin (metaquo)***

**pH 5**

***T*(oC) *E*m (mV vs Ag-AgCl)**

6.02 -97.0

10.52 -104

15.27 -108

20.37 -114

25.12 -111

29.72 -127

34.37 -123

39.12 -128

**pH 7**

***T*(oC) *E*m (mV vs Ag-AgCl)**

10.6 -136

15.6 -148

20.4 -143

25 -151

25.3 -151

30 -144

35 -144

39.7 -151

***Table 4. Reduction potential Em values* *for adult hemoglobin (metaquo)***

**pH 5**

***T*(oC) *E*m (mV vs Ag-AgCl)**

5.97 -24.06

12.62 -28.43

22.2 -31.32

25.1 -46.5

29.7 -55.7

31.7 -63.84

34.3 -68.85

**pH 7**

***T*(oC) *E*m (mV vs Ag-AgCl)**

6.02 35.75

11.12 15.24

15.72 1.5

21.62 -37.98

25.12 -46.34

29.72 -55.7

34.57 -76.31

39.32 -62.6

***Table 5. Reduction potential Em values* *for horse heart myoglobin (heme-fluoride complex)***

**pH 5**

**Low Temperature**

***T*(oC) *E*m (mV vs Ag-AgCl)**

11.4 -217

15.4 -226

18.2 -225

20.4 -226

25.4 -230

**High Temperature**

***T*(oC) *E*m (mV vs Ag-AgCl)**

32.4 -227

34.1 -226

39.4 -218

44.5 -211

**pH 7**

***T*(oC) *E*m (mV vs Ag-AgCl)**

10.5 -189

20.3 -200

39.8 -212

30 -206

***Table 6. Reduction potential Em values* *for adult hemoglobin (heme-fluoride complex)***

**pH 5**

**Low Temperature**

***T*(oC) *E*m (mV vs Ag-AgCl)**

5.72 -131

8.0 -137

11.2 -130

12.5 -126

15.7 -122

17.5 -121

**High Temperature**

***T*(oC) *E*m (mV vs Ag-AgCl)**

21 -133

25 -128

25.5 -126

32.5 -137

35 -128

39.4 -147

**pH 7**

***T*(oC) *E*m (mV vs Ag-AgCl)**

11.1 -117

25.3 -131

39.1 -149

17.5 -125.5

**3.0 *Em vs Temperature plots***

The *E*m vs Temperature plots and the *E*m/*T* vs 1/*T* plots for Hh-Mb and A-Hb are shown in Fig. 6 of the Results section. Below are the *E*m vs Temperature plots for the one-electron reduction of the heme-fluoride complexes of Hh-Mb and A-Hb at pH 5. Here, we only show the *E*m vs Temperature plots to show that the statistical analyses establish that the best way to represent the data for the heme-bound fluoride complexes at pH 5 is by using two temperature ranges: low and high temperatures.


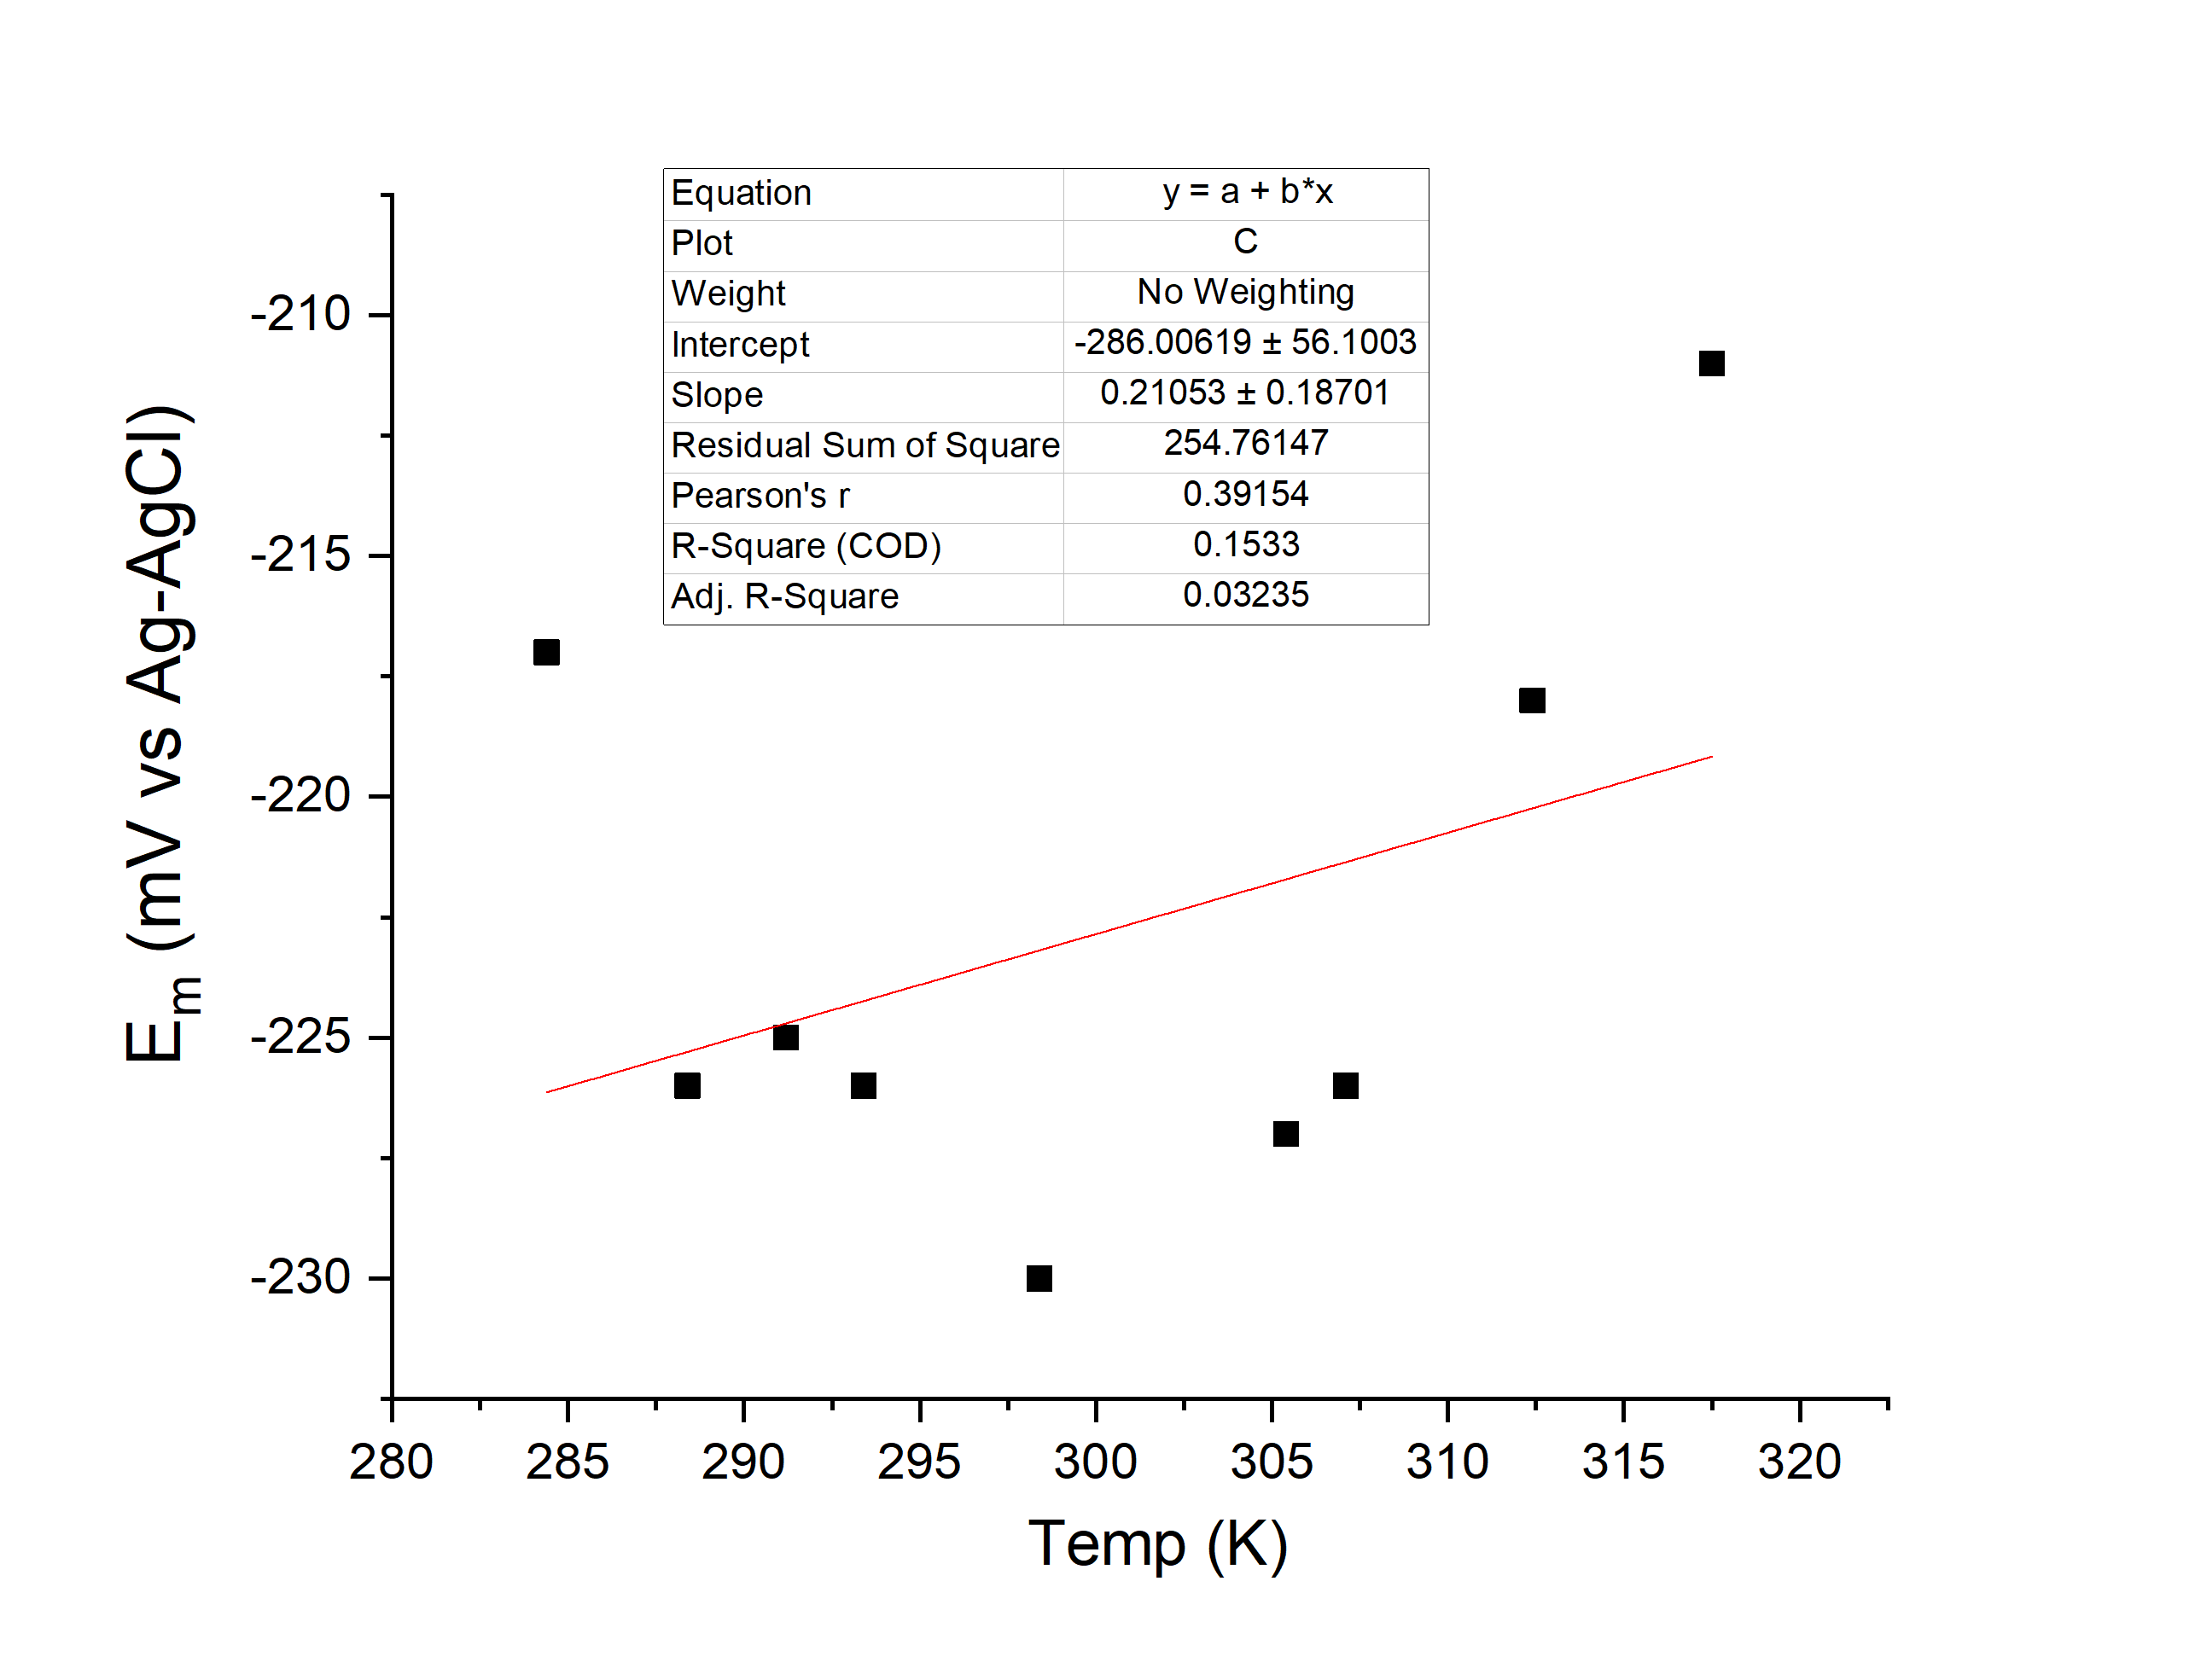


**Fig. 3.** *E*m vs Temperature plotfor horse heart myoglobin (heme-fluoride complex) at pH 5. The linear fit is used to fit all the data points from Table 5, pH 5. The complete statistical analysis is shown in Fig. 4.


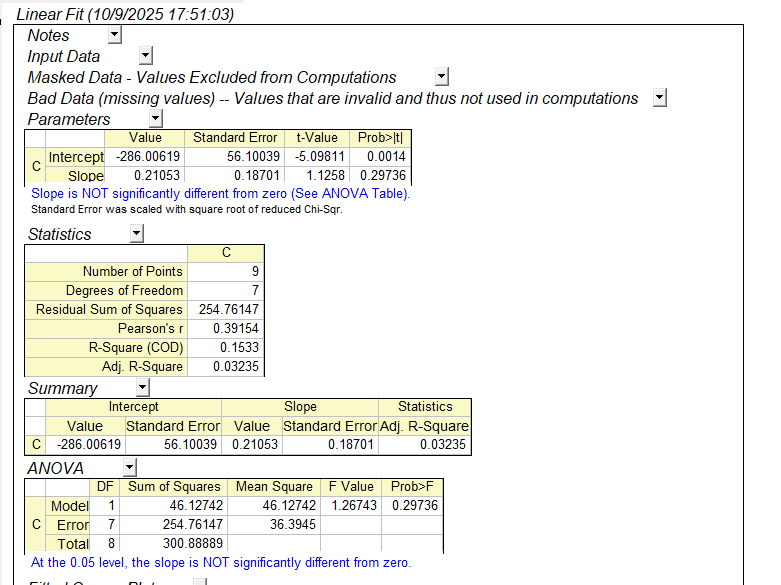


**Fig. 4.** Screenshot of the Origin 2018b© statistical analysis of the *E*m vs Temperature plotfor horse heart myoglobin (heme-fluoride complex) at pH 5 shown in Fig. 3.


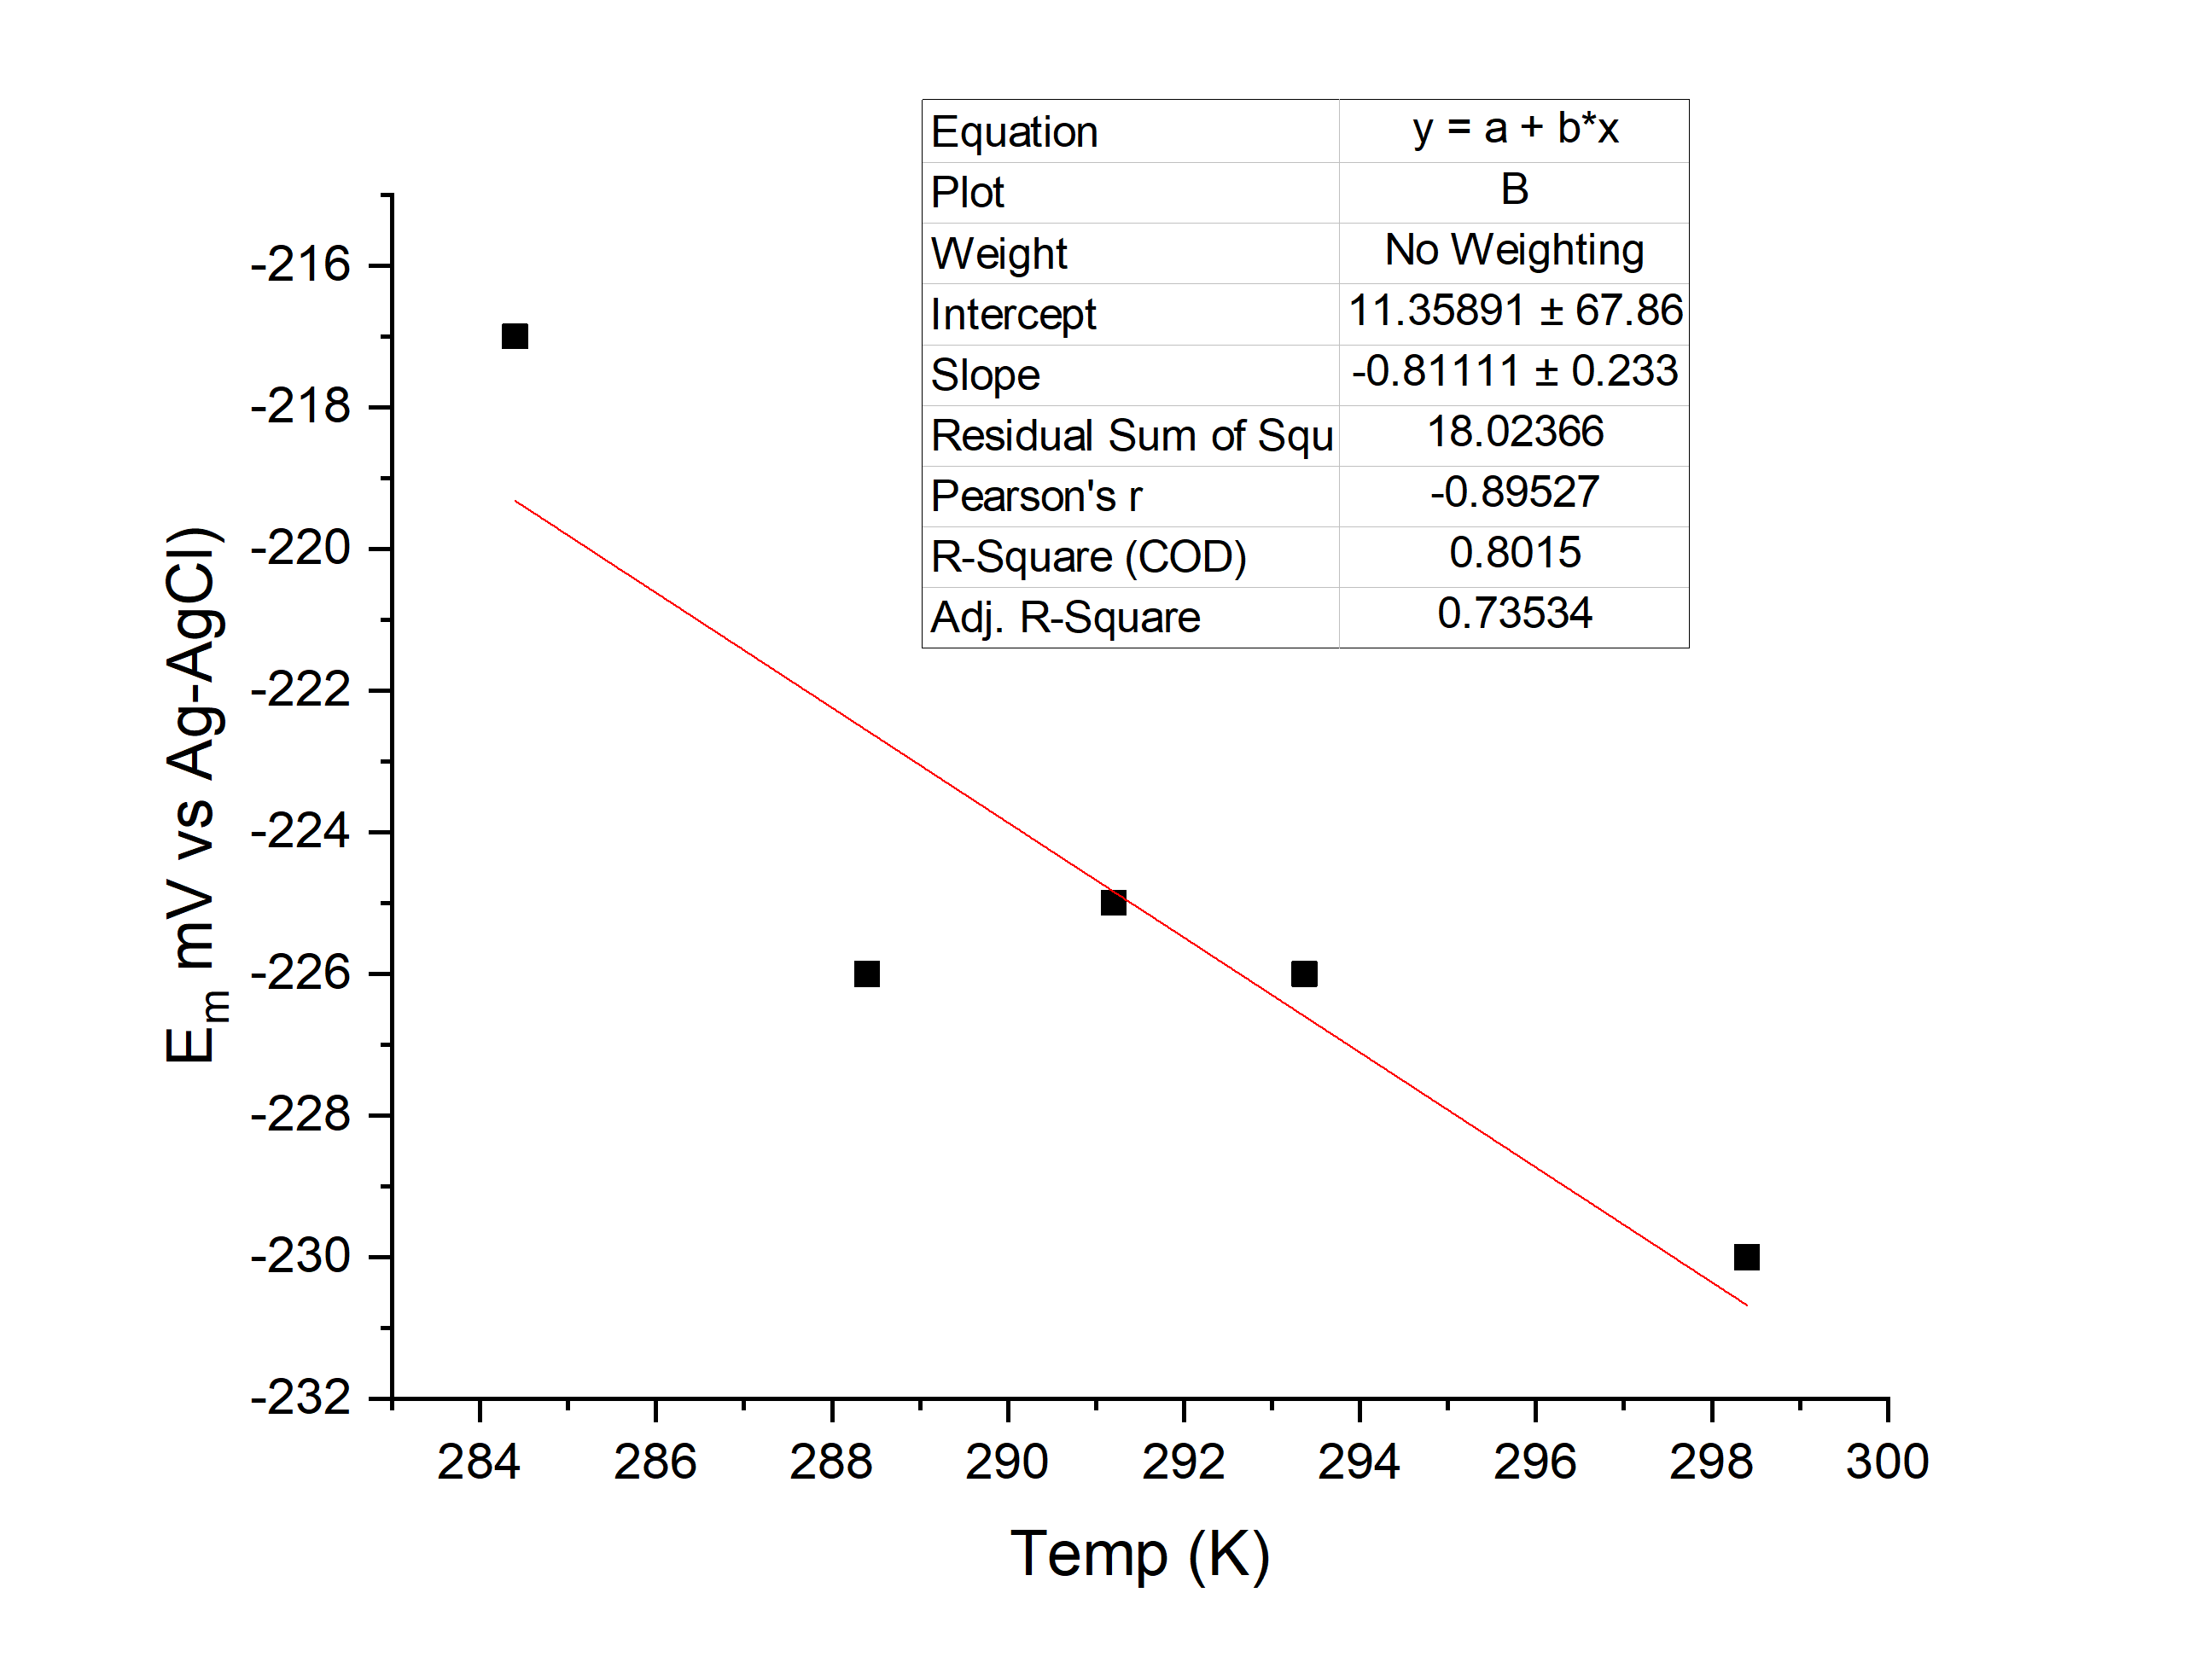


**Fig. 5.** *E*m vs Temperature plotfor horse heart myoglobin (heme-fluoride complex) at pH 5, low temperature range. The complete statistical analysis is shown in Fig. 6.


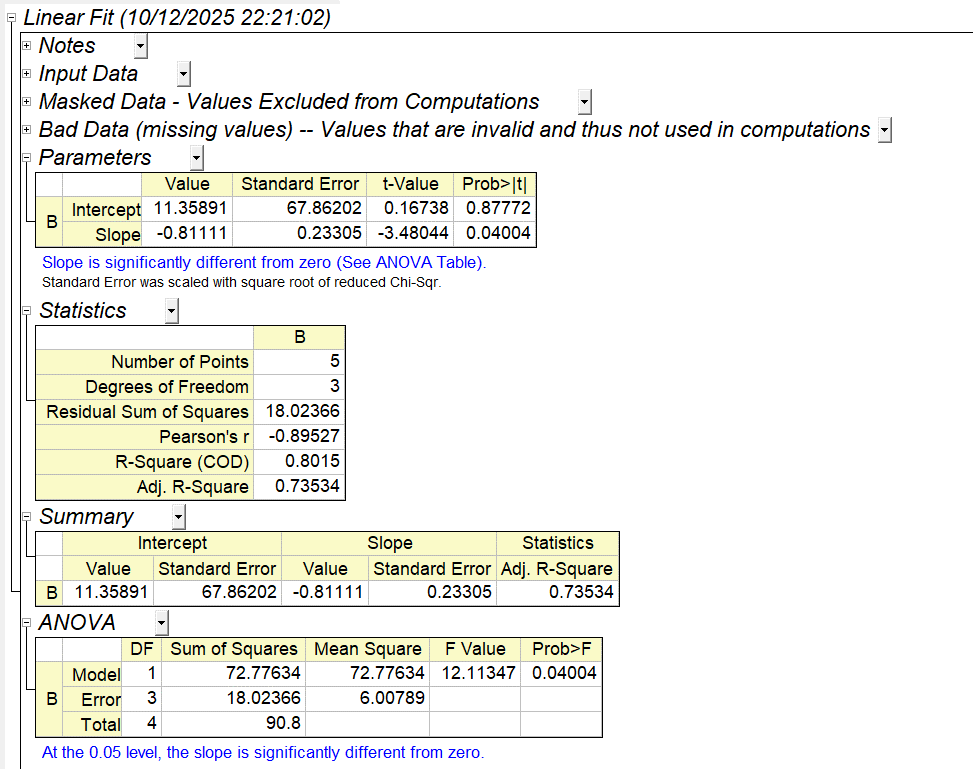


**Fig. 6.** Screenshot of the Origin 2018b© statistical analysis of the *E*m vs Temperature plotfor horse heart myoglobin (heme-fluoride complex) at pH 5, “low temperature” shown in Fig. 5.


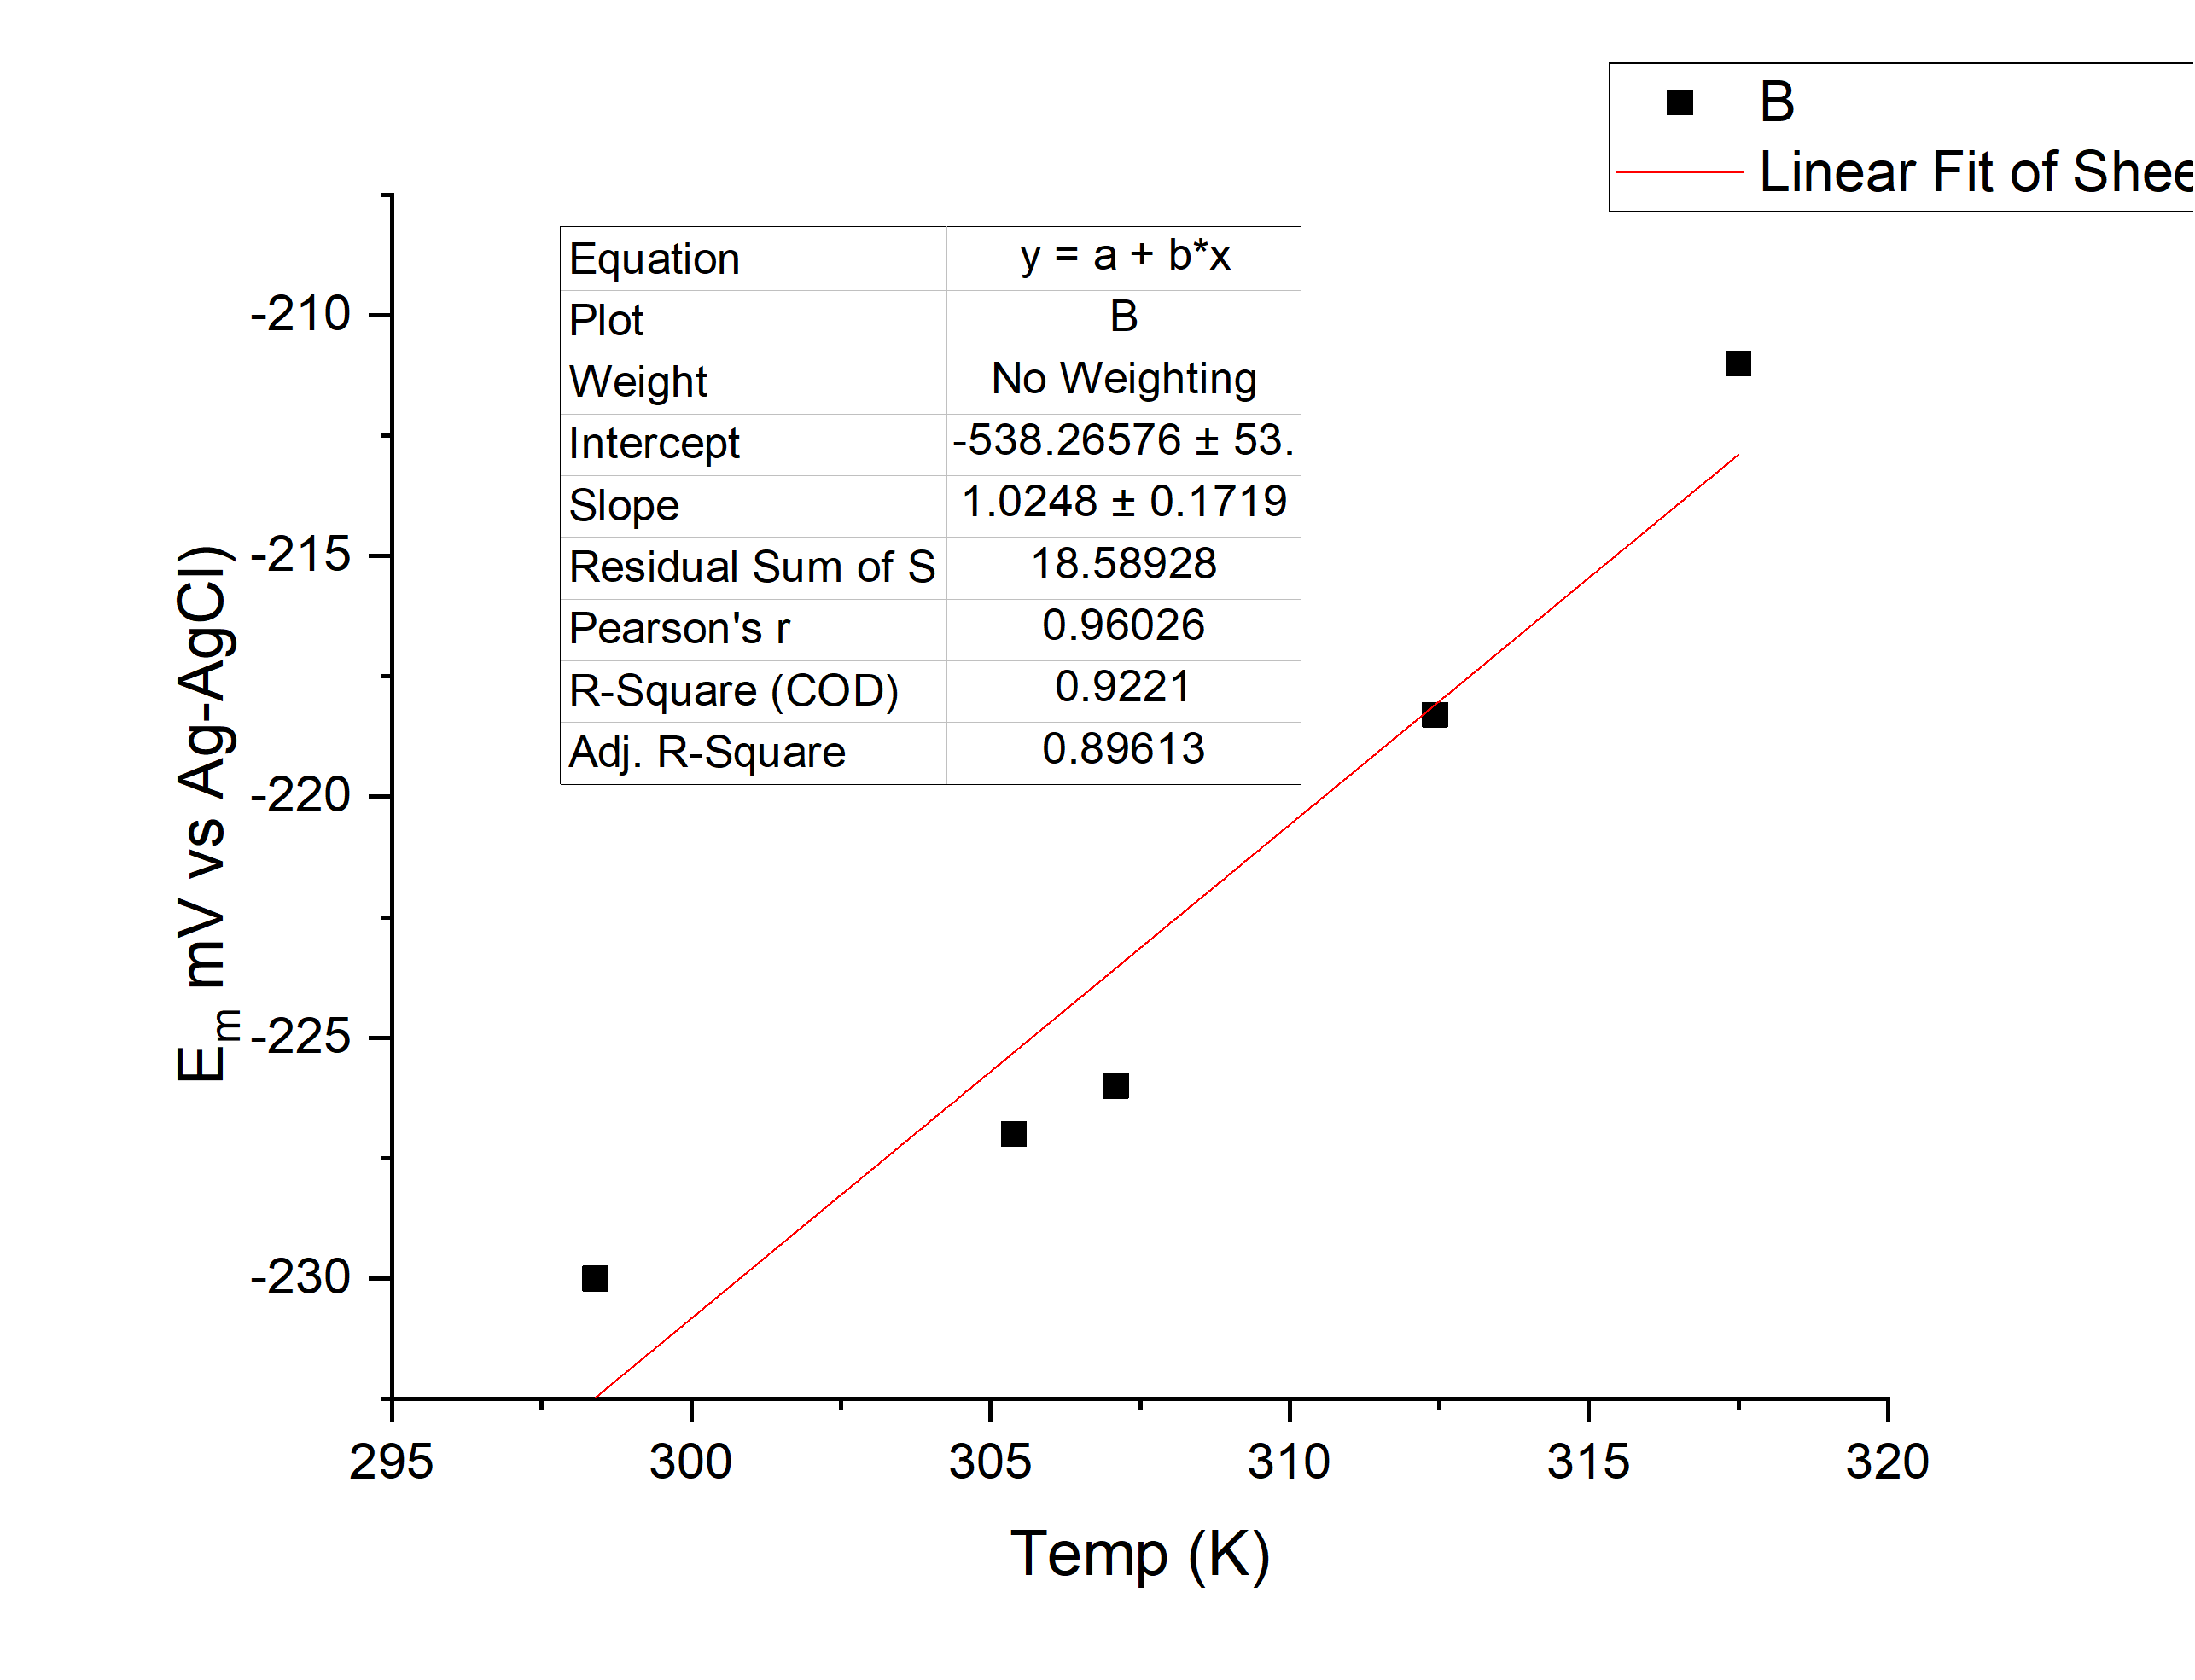


**Fig. 7.** *E*m vs Temperature plotfor horse heart myoglobin (heme-fluoride complex) at pH 5, high temperature range. The complete statistical analysis is shown in Fig. 8.


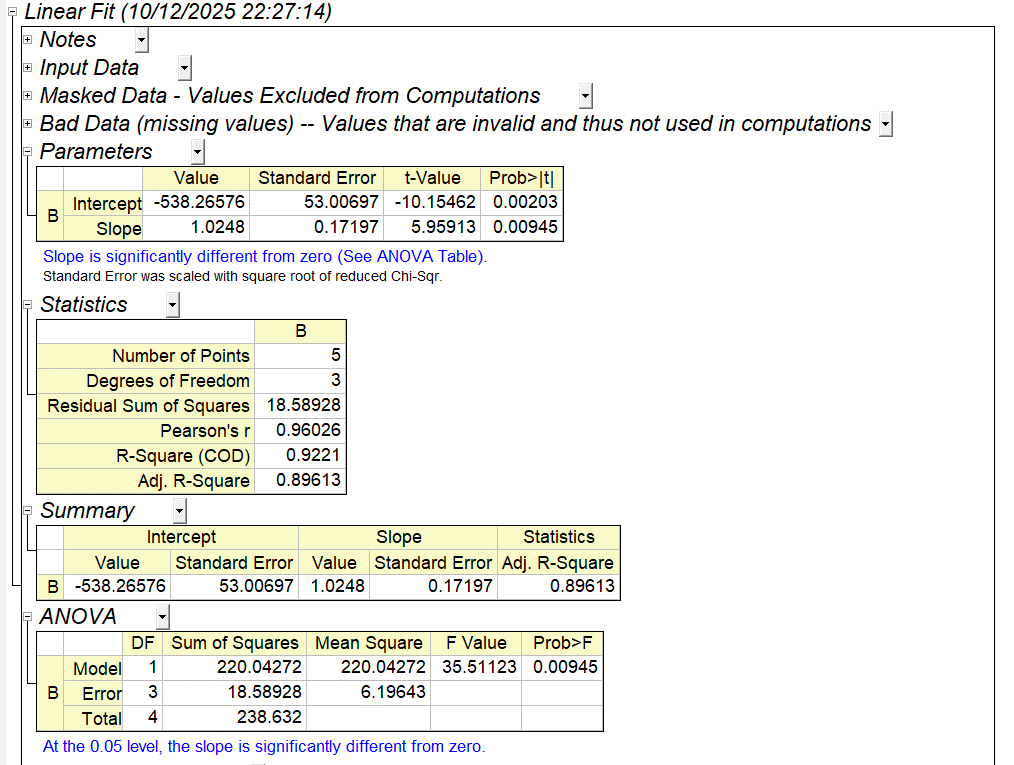


**Fig. 8.** Screenshot of the Origin 2018b© statistical analysis of the *E*m vs Temperature plotfor horse heart myoglobin (heme-fluoride complex) at pH 5, “high temperature” shown in Fig. 7.


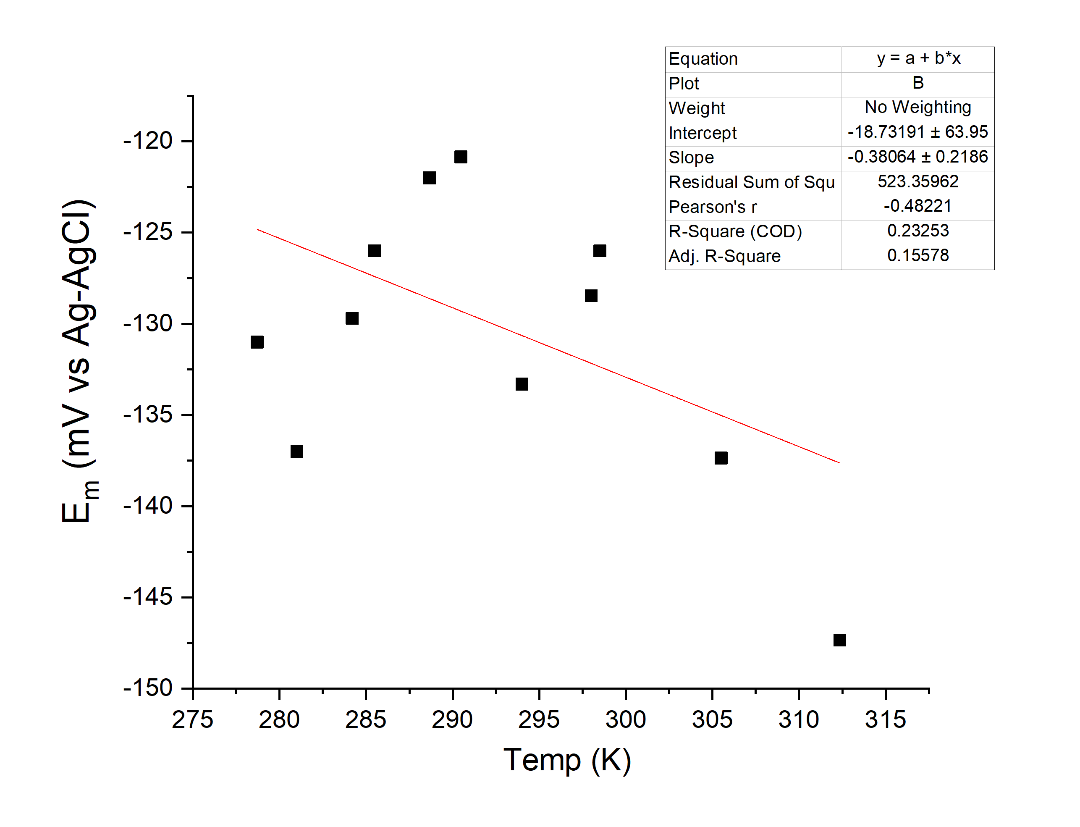


**Fig. 9.** *E*m vs Temperature plotfor adult hemoglobin (heme-fluoride complex) at pH 5. The linear fit is used to fit all the data points from Table 6, pH 5. The complete statistical analysis is shown in Fig. 10.


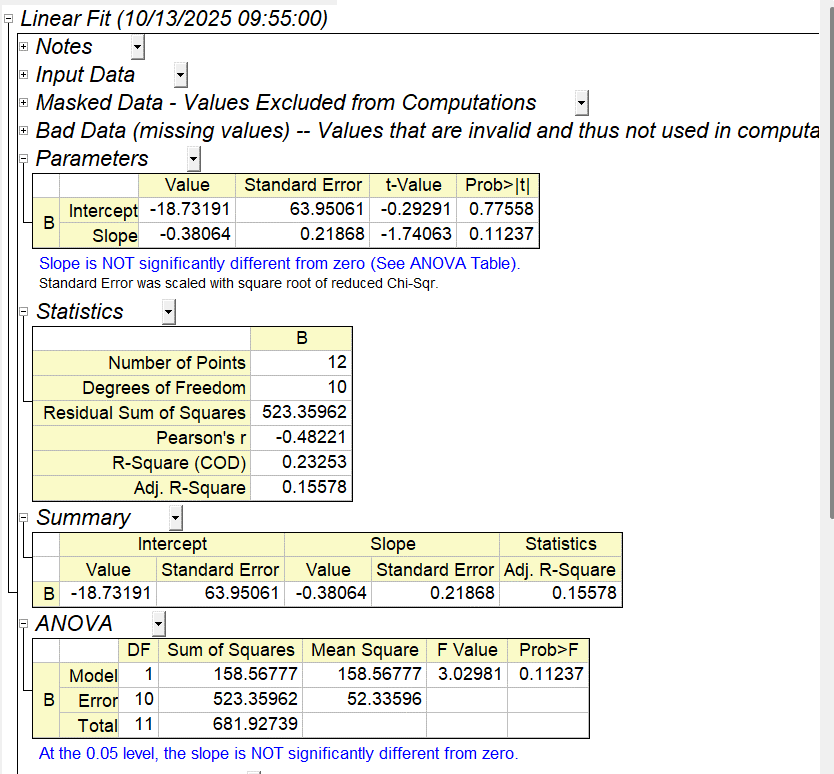


**Fig. 10.** Screenshot of the Origin 2018b© statistical analysis of the *E*m vs Temperature plotfor adult hemoglobin (heme-fluoride complex) at pH 5 shown in Fig. 9.


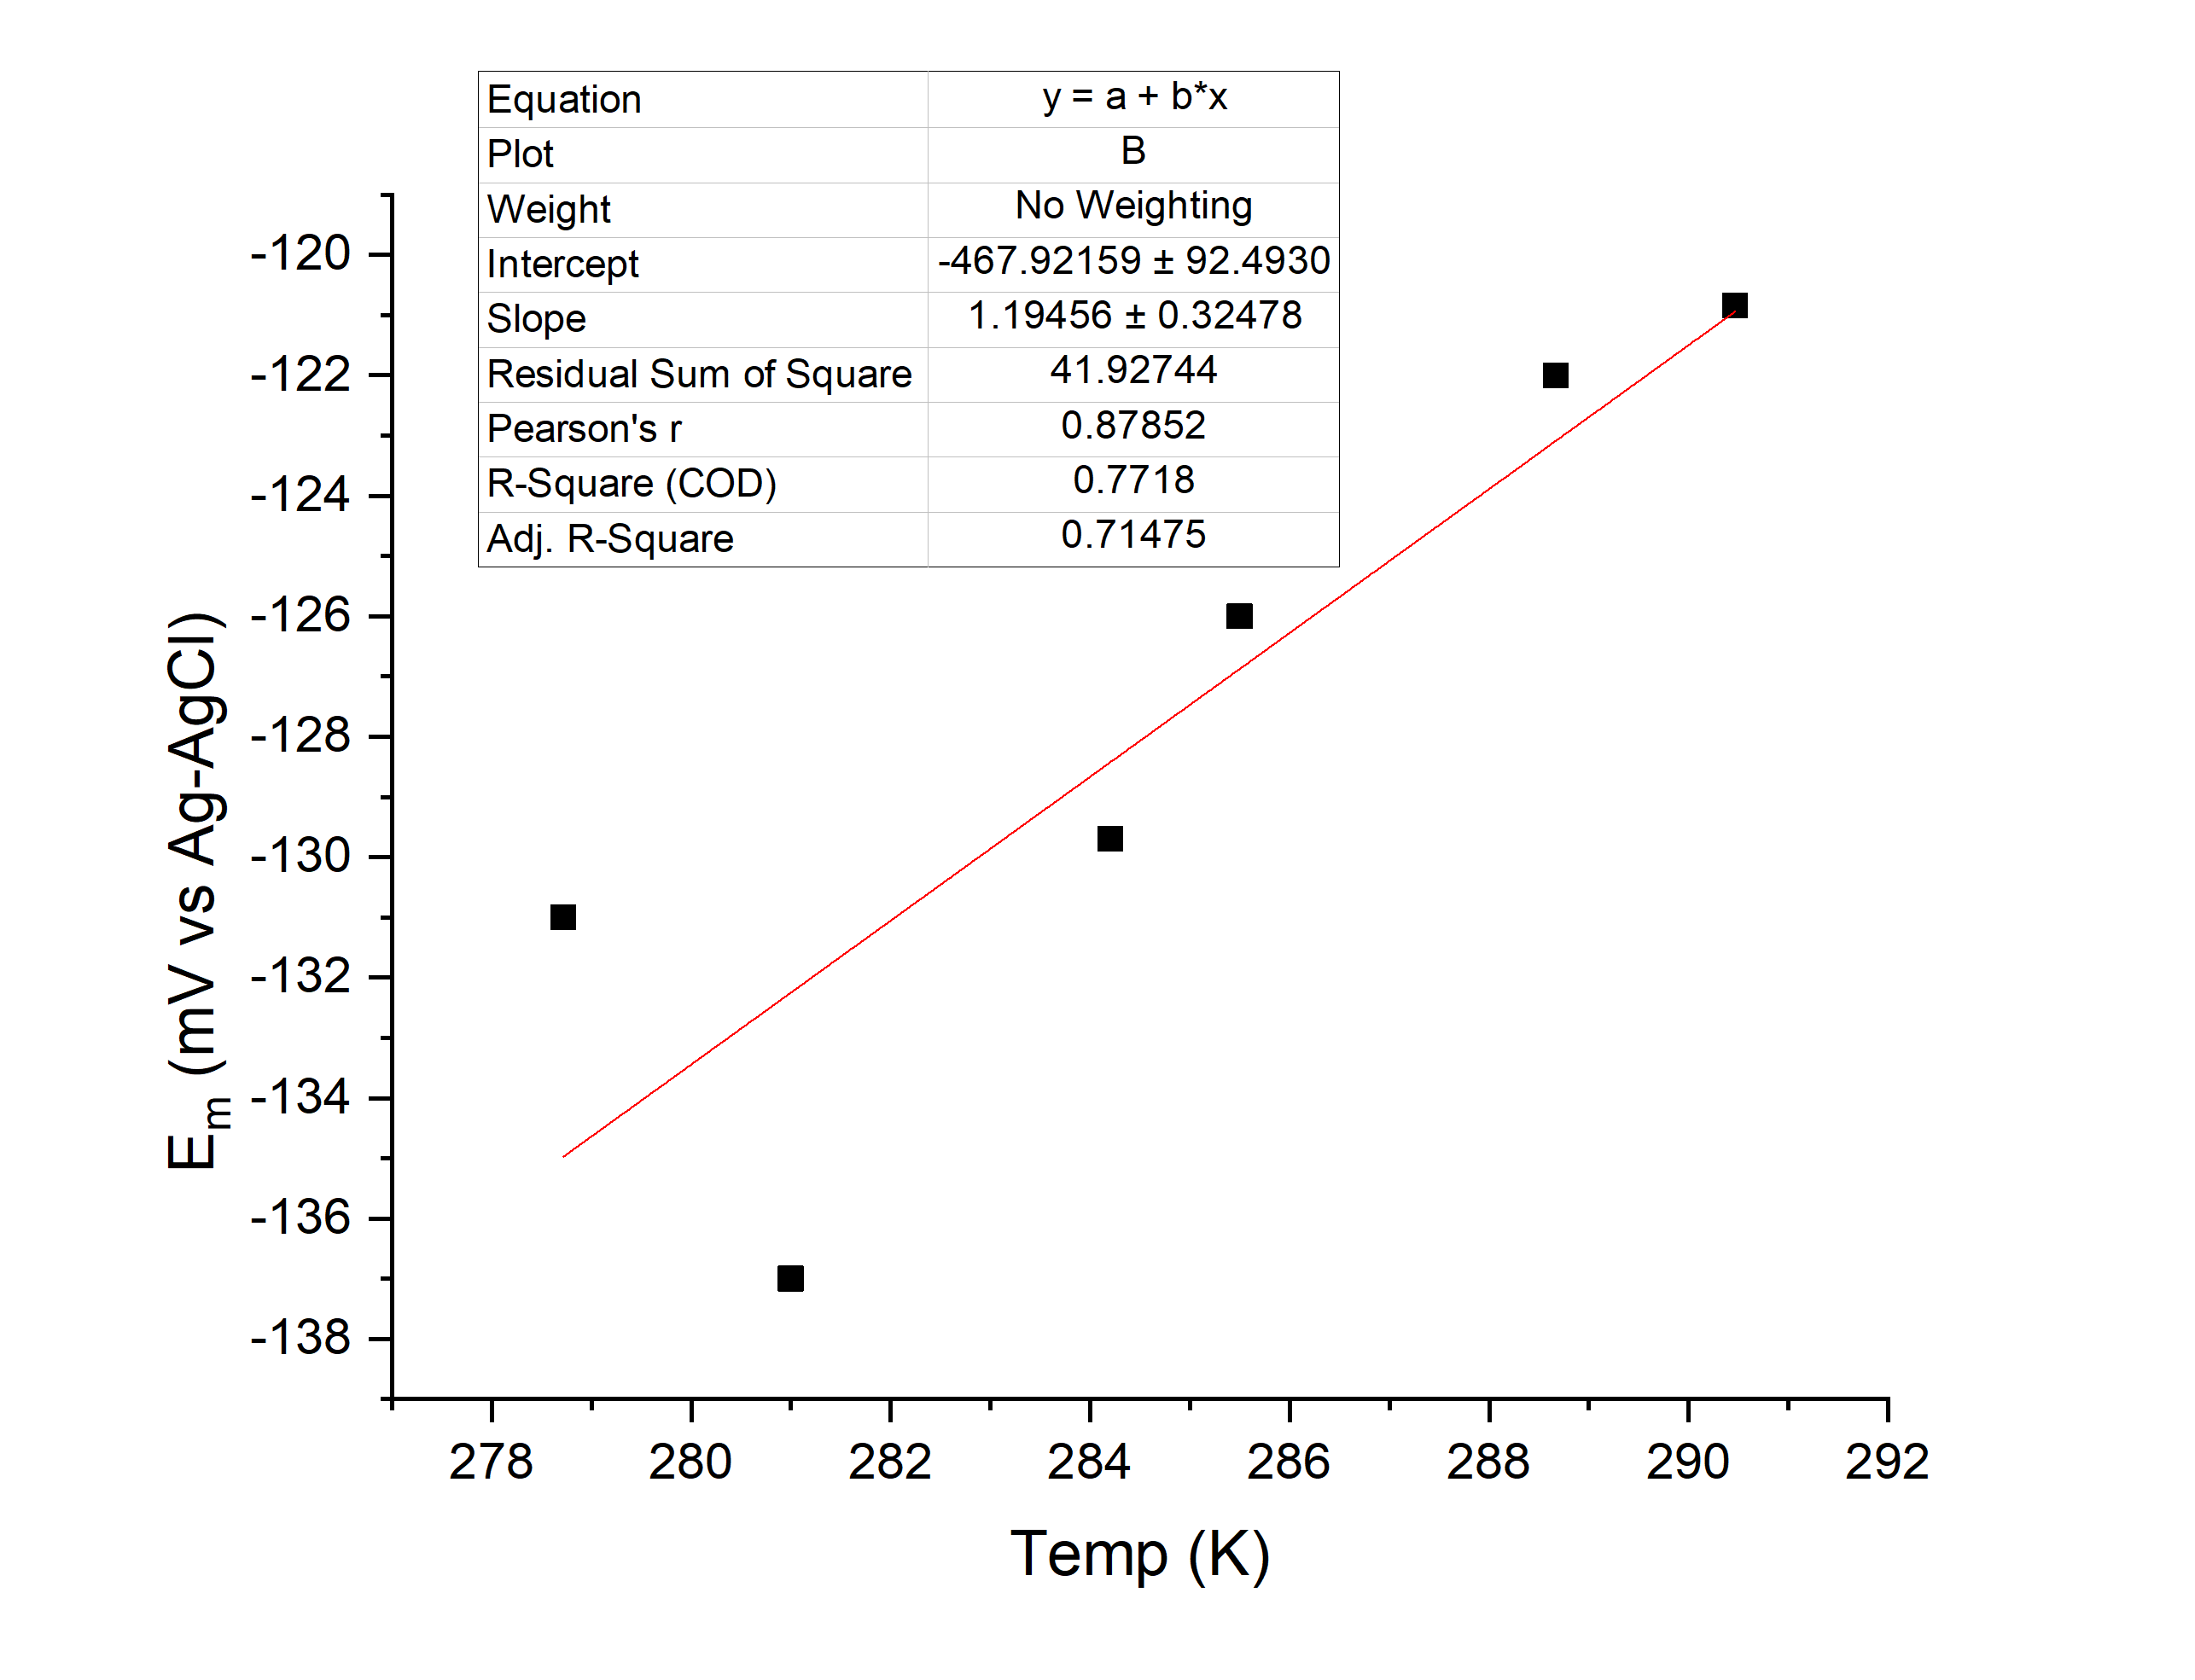


**Fig. 11.** *E*m vs Temperature plotfor adult hemoglobin (heme-fluoride complex) at pH 5, low temperature range. The complete statistical analysis is shown in Fig. 12.


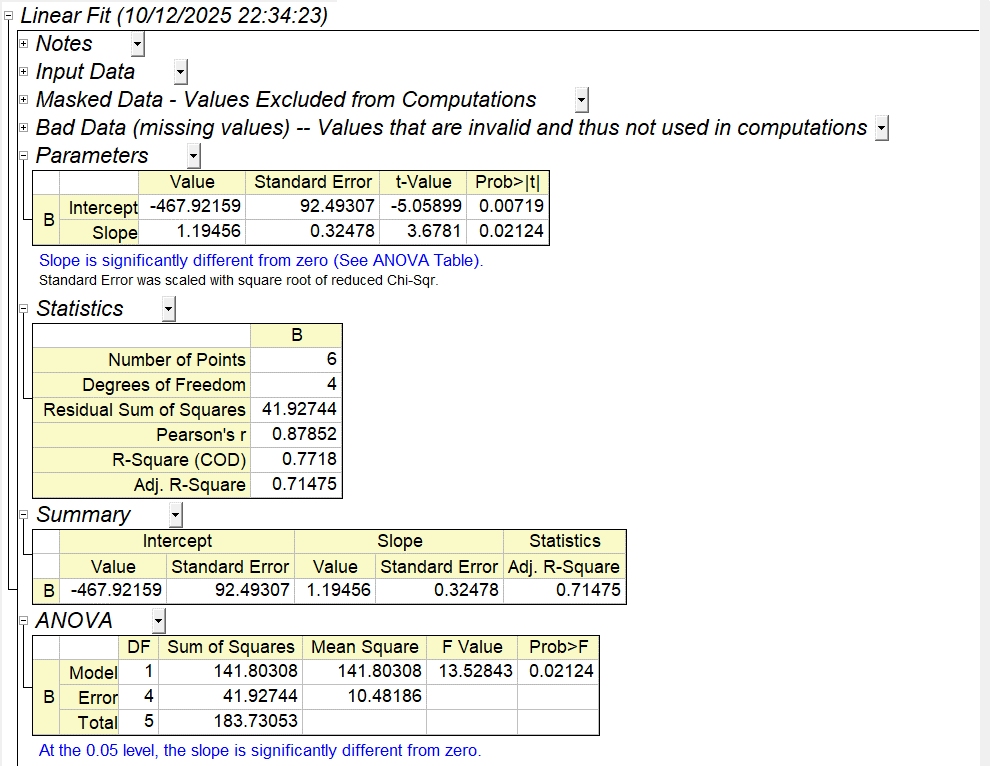


**Fig. 12.** Screenshot of the Origin 2018b© statistical analysis of the *E*m vs Temperature plotfor adult hemoglobin (heme-fluoride complex) at pH 5, “low temperature” shown in Fig. 11.


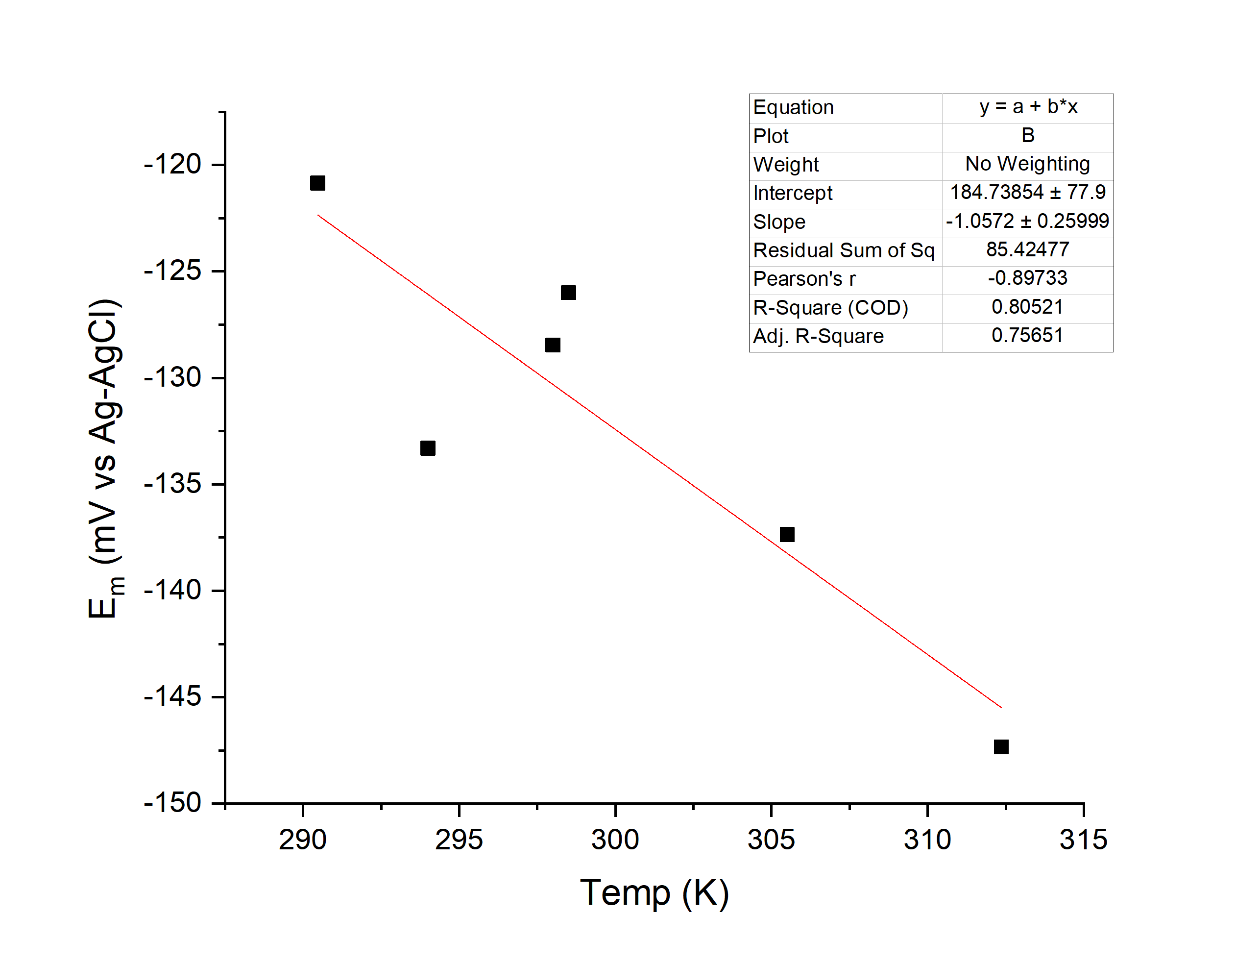


**Fig. 13.** *E*m vs Temperature plotfor adult hemoglobin (heme-fluoride complex) at pH 5, high temperature range. The complete statistical analysis is shown in Fig. 14.


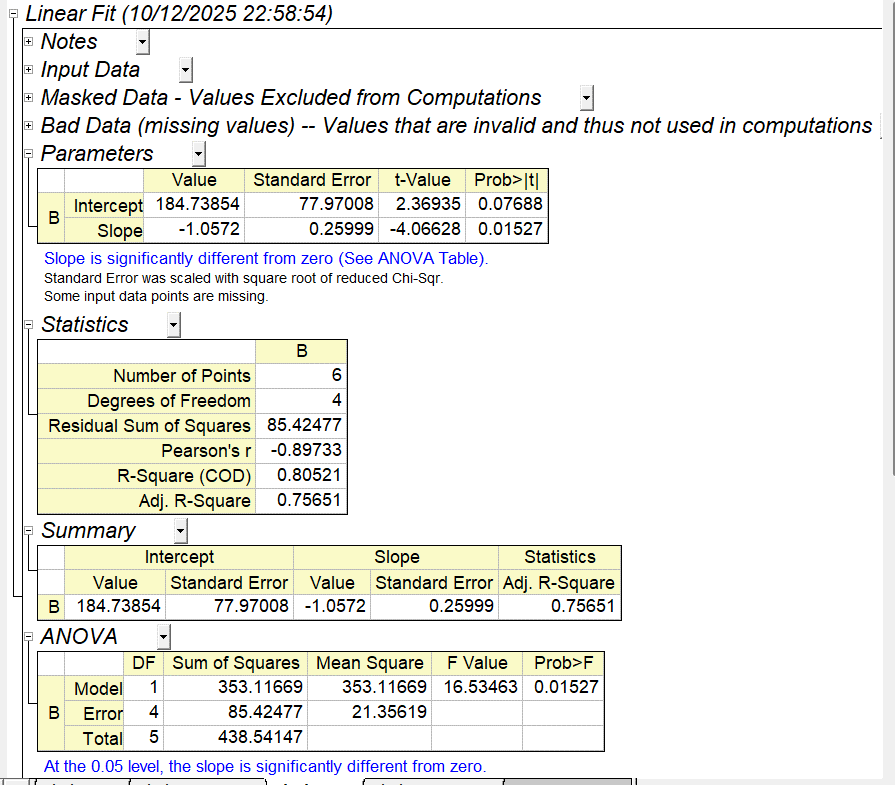


**Fig. 14.** Screenshot of the Origin 2018b© statistical analysis of the *E*m vs Temperature plotfor adult hemoglobin (heme-fluoride complex) at pH 5, “high temperature” shown in Fig. 13.

**Redox changes (oxidation)**


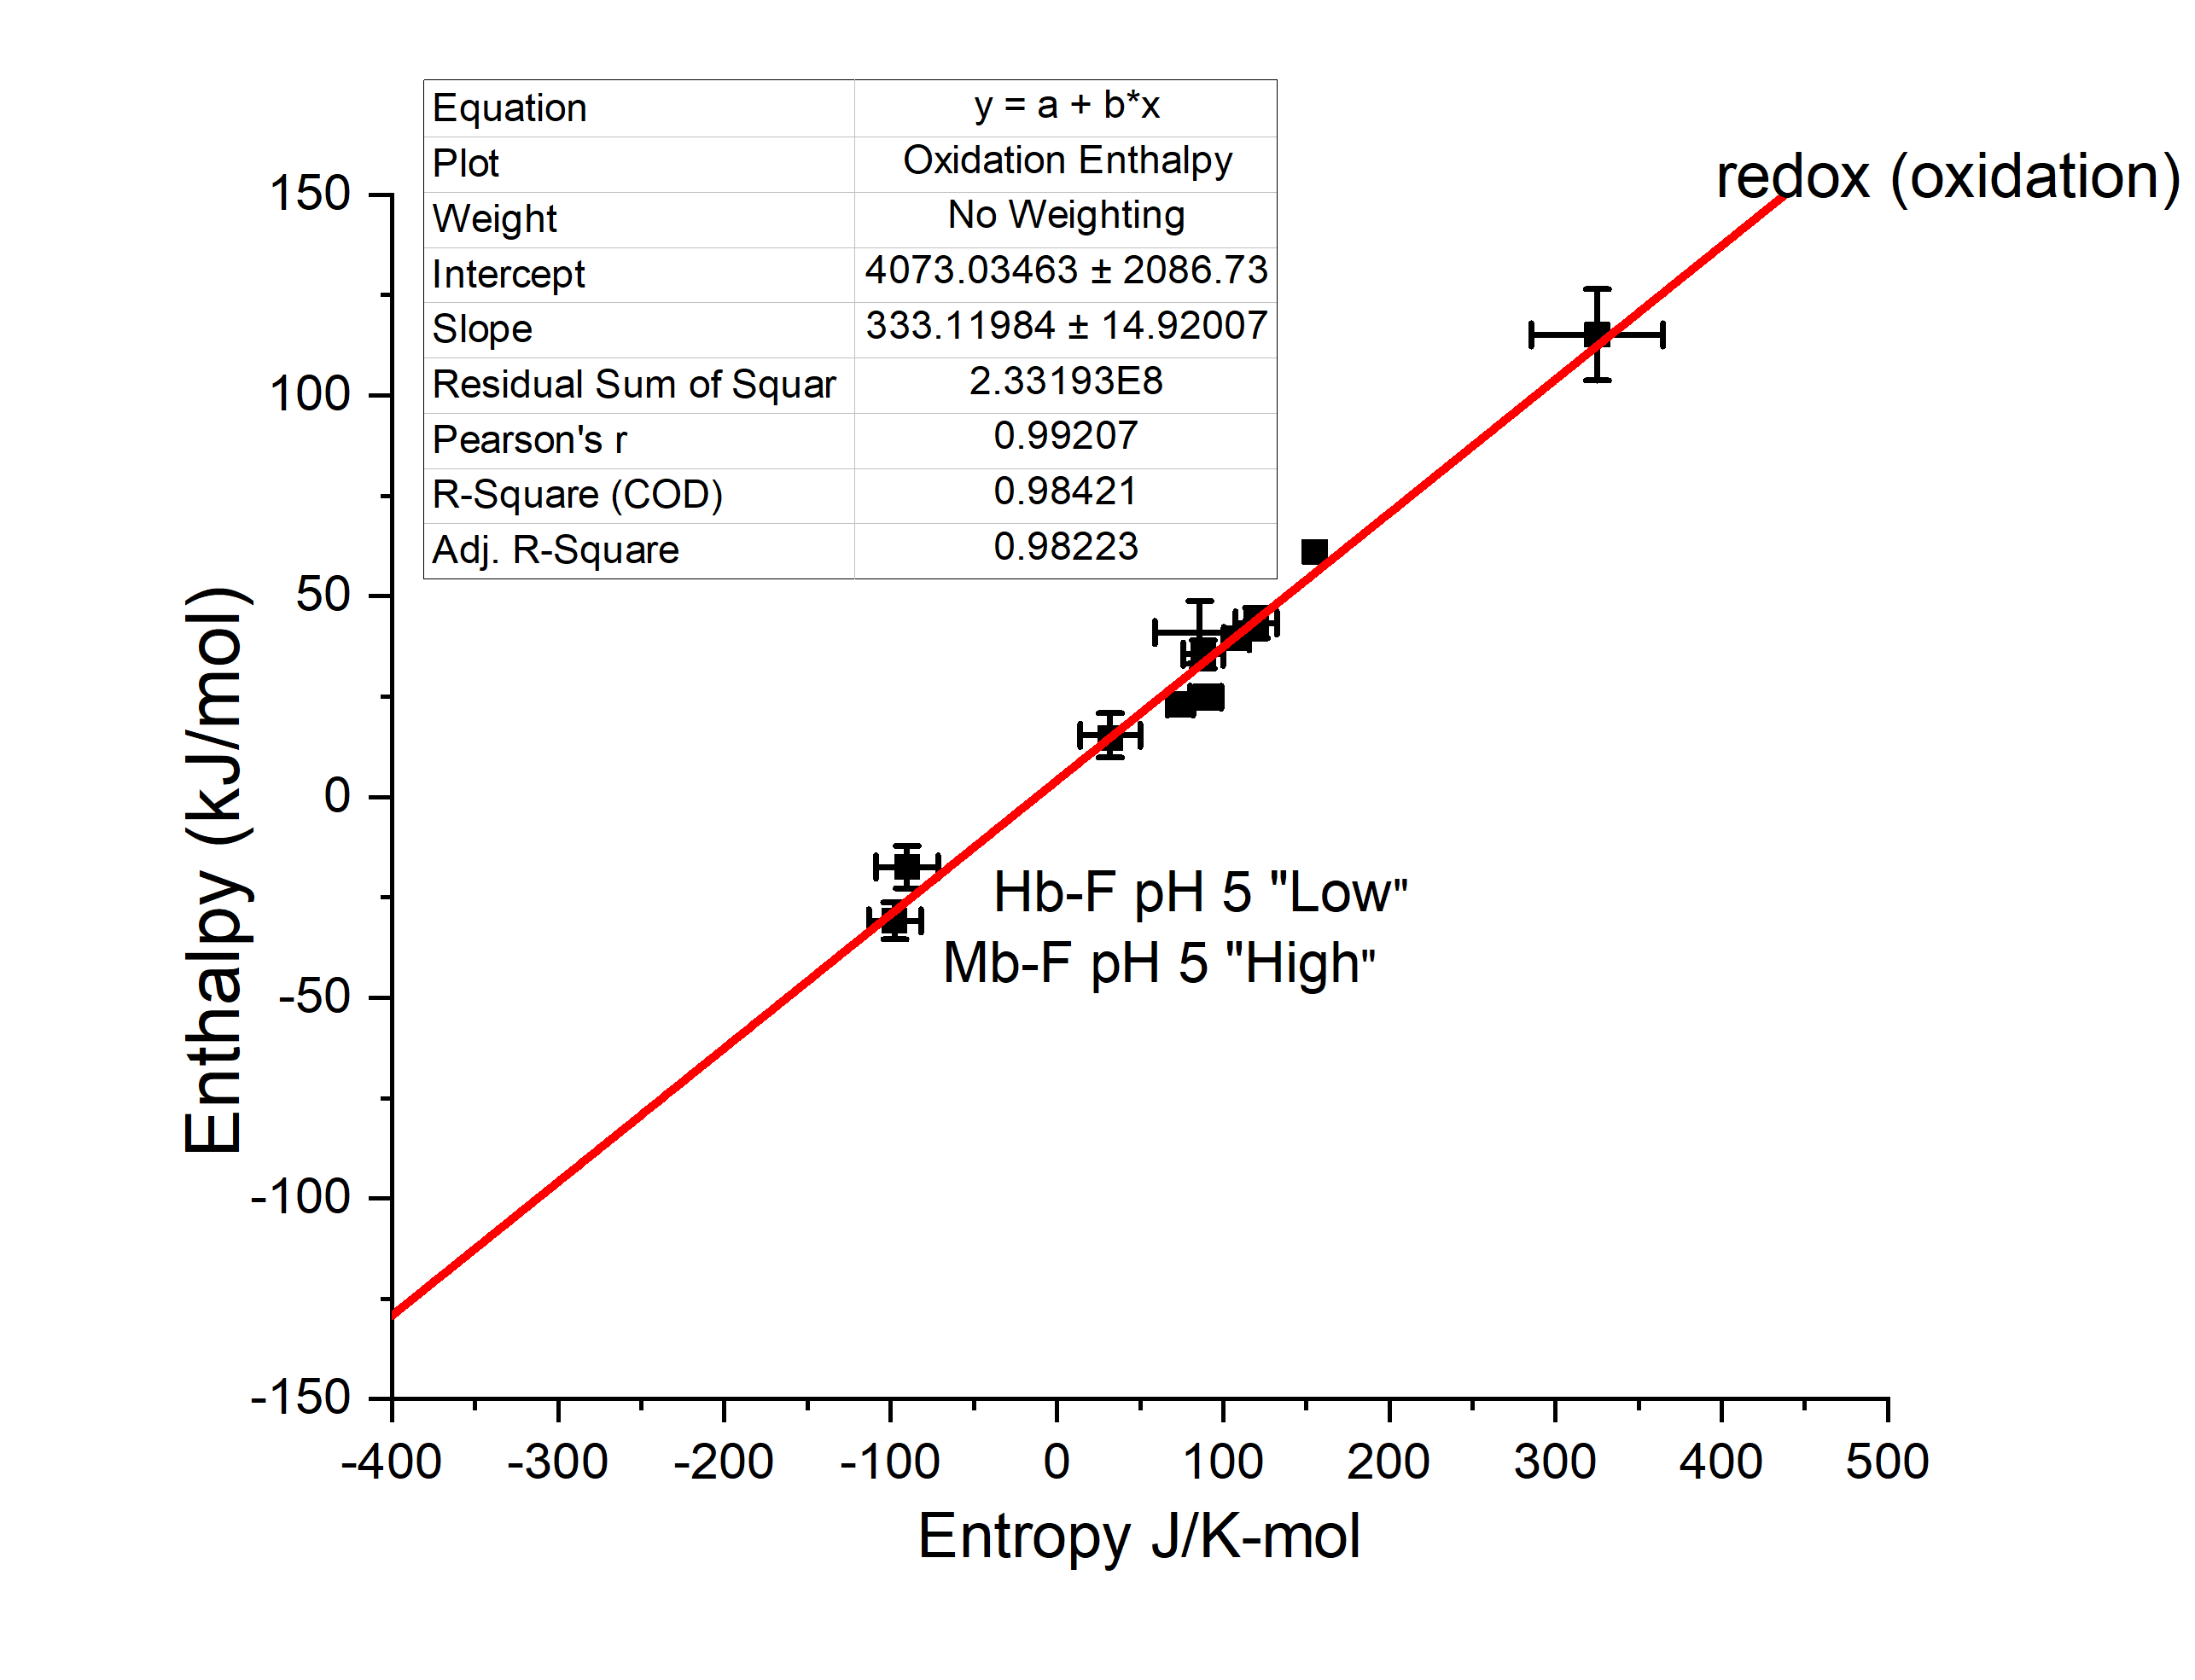


**Fig. 15**. Enthalpy versus entropy plot. The enthalpy-entropy compensation plot for the oxidation of Hh-Mb, A-Hb, Mb-F, and Hb-F.


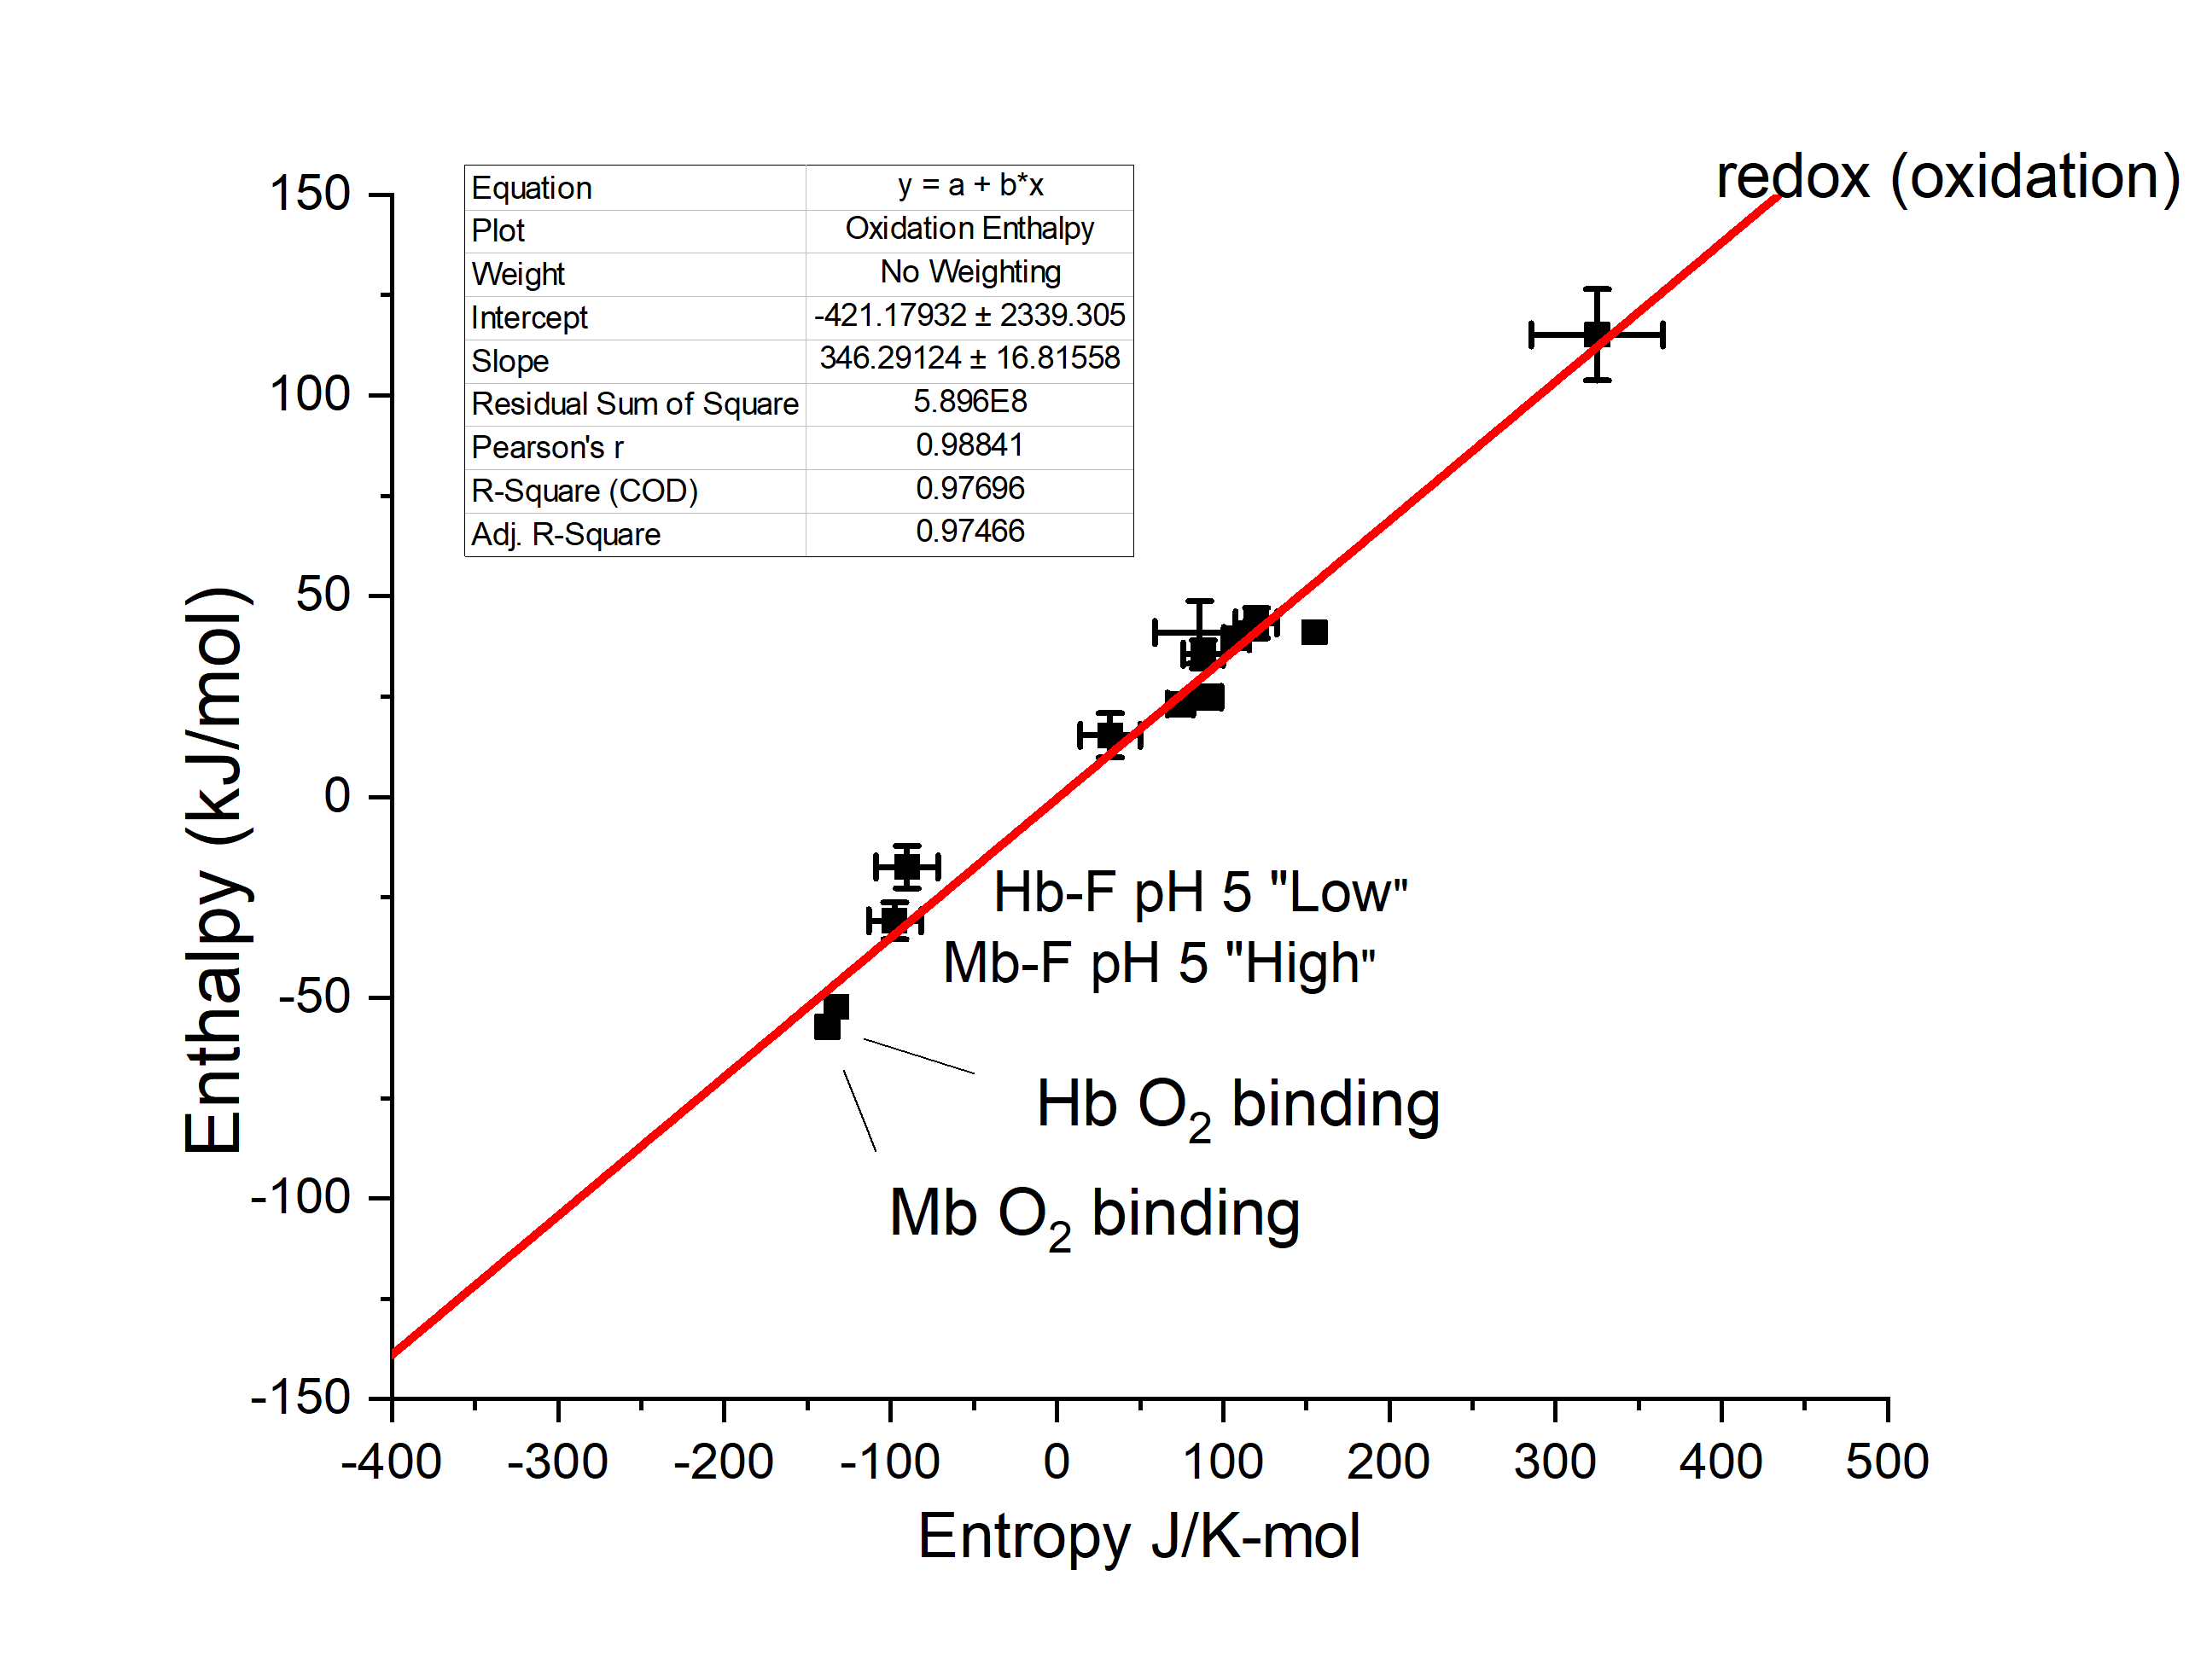


**Fig. 16**. Enthalpy versus entropy plot. The enthalpy-entropy compensation plot for the oxidation of Hh-Mb, A-Hb, Mb-F, and Hb-F. Oxygen binding equilibria data from Mb2 and Hb26 are included.

**References**

(1)Cerda, J. F.; Roeder, M. H.; Houchins, D. N.; Guzman, C. X.; Amendola, E. J.; Castorino, J. D.; Fritz, A. L. *Anal. Biochem.* **2013**, *443*, 75-77.

(2)Frankenfield, K.; Marchany-Rivera, D.; Flanders, K. G.; Cruz-Balberdy, A.; Lopez-Garriga, J.; Cerda, J. F. *Journal of Inorganic Biochemistry* **2021**, *224*, 111578.

(3)Flanders, K. G.; Pessagno, L. R.; Cerda, J. F. *Polyhedron* **2021**, *203*, 115238.

(4)Antonini, E.; Brunori, M. *Hemoglobin and Myoglobin in their Reactions with Ligands*; North-Holland Publishing Co.: Amsterdam, 1971; Vol. 21.

(5)Antonini, E. *Physiol. Rev.* **1965**, *45*, 123.

(6)Collman, J. P.; Brauman, J. I.; Suslick, K. S. *Journal of the American Chemical Society* **1975**, *97*, 7185-7186.

(7)Imai, K.; Yonetani, T. *Journal of Biological Chemistry* **1975**, *250*, 7093-7098.

(8)Atha, D. H.; Ackers, G. K. *Biochemistry* **1974**, *13*, 2376-2382.

(9)Cerda, J. F.; Guzman, C. X.; Zhang, H.; Amendola, E. J.; Castorino, J. D.; Millet, N.; Fritz, A. L.; Houchins, D. N.; Roeder, M. H. *Electrochem. Commun.* **2013**, *33*, 76-79.

(10)Antonini, E.; Wyman, J.; Brunori, M.; Taylor, J. F.; Rossi-Fanelli, A.; Caputo, A. *J Biol Chem* **1964**, *239*, 907-912.

(11)Brunori, M.; Wyman, J.; Antonini, E.; Rossi-Fanelli, A. *Journal of Biological Chemistry* **1965**, *240*, 3317-3324.
